# Supplementary material for: Endogenous tagging using split mNeonGreen in human iPSCs for live imaging studies
Source: eLife. 2024 Apr 23;12:RP92819. doi: 10.7554/eLife.92819 (PMC11037917; doi:10.7554/eLife.92819)
Supplement: Figure 1—figure supplement 1—source data 1. [file elife-92819-fig1-figsupp1-data1.xlsx]

## Sheet: A
mNG2(1-10) normalized amplification curves
Sample	1	2	3	4	5	6	7	8	9	10	11	12	13	14	15	16	17	18	19	20	21	22	23	24	25	26	27	28	29	30	31	32	33	34	35	36	37	38	39	40
Clone 1	0.00377633	0.00177345	0.000979565	0.00136451	0.00149011	0.00220961	0.00276886	0.00368491	0.0047711	0.00501761	0.00543072	0.00767982	0.00700777	0.0045785	0.00142948	0.000787199	0.000153676	0	0.00189324	0.00214413	0.00139119	0.00344613	0.00582538	0.0120905	0.0249915	0.0541664	0.11438	0.218694	0.370028	0.556738	0.756124	0.933532	1.08286	1.2062	1.3053	1.38394	1.44788	1.50345	1.54493	1.57677
Clone 2	0.00493492	0.00305167	0.00234367	0.00304088	0.00314228	0.00186235	0.00108977	0.00130367	0.00198545	0.00265768	0.00278409	0.00278244	0.00261457	0.00165683	0.00153635	0.000226021	0.000702456	0.00174755	0.00100647	0	0.00117891	0.00384152	0.00593029	0.0112068	0.0283211	0.065704	0.139829	0.262898	0.430574	0.624445	0.815817	0.98484	1.12011	1.23229	1.33006	1.40548	1.47402	1.52638	1.57695	1.61165
Clone 3	0.0031807	0.00194005	0.00174921	0.00180398	0.00190419	0.00174656	0.00130058	0.00165457	0.00165408	0.00382204	0.00163504	8.4892e-05	0.000448797	0.000659369	2.4002e-05	0	0.0010026	0.00154782	0.00162932	0.00051929	0.000706467	0.00210615	0.00482262	0.00834751	0.0208163	0.0488676	0.105573	0.20522	0.359754	0.551203	0.761031	0.957853	1.12173	1.25664	1.3688	1.46426	1.53847	1.60032	1.65383	1.69502
Clone 4	0.00195888	0.00107781	0.00131433	0.00186717	0.00154773	0.00118564	0.000925656	0.00291533	0.00401734	0.00322085	0.00151208	0.00120438	0.000533572	0	0.000503132	0.00108333	0.00298196	0.00216669	0.00136606	0.000417853	0.00189543	0.00337775	0.00782805	0.0192271	0.0443171	0.0955405	0.193	0.345377	0.547877	0.769092	0.982455	1.17383	1.32603	1.44707	1.55142	1.63786	1.71721	1.76718	1.81516	1.85267
Clone 5	0.00254807	0.00154733	0.00152855	0.0024211	0.00253926	0.00318408	0.00319069	0.00319292	0.00226037	0.00206397	0.00283727	0.00156083	0.00121989	0.00166137	0.000741846	0	0.00193691	0.00256701	0.00228618	0.00307322	0.00444808	0.00788172	0.0161651	0.0380268	0.0836846	0.166509	0.302206	0.488374	0.699938	0.907605	1.08285	1.23457	1.35363	1.4529	1.54044	1.61159	1.67203	1.72198	1.76754	1.79422
Clone 6	0.00240562	0.0026463	0.00192311	0.000964904	0.000545402	0.000446126	0.00194124	0.00234119	0.00134856	0.00114238	0.00184577	0.00161536	0.000833197	0.00116349	0.000976835	0	0.000965054	0.00133612	0.000881331	0.00276847	0.00893263	0.0213439	0.0466166	0.101893	0.20752	0.371395	0.585745	0.822962	1.04226	1.23952	1.40005	1.53272	1.63751	1.71919	1.78509	1.84316	1.89508	1.94696	1.98165	2.01514
Clone 7	0.00357204	0.00214289	0.00101368	0.00225813	0.00292832	0.00276407	0.00220545	0.00200965	0.0022426	0.00107325	0	0.000689263	0.000696888	0.000836059	0.000977437	0.000767236	0.00178009	0.0012235	0.000720044	0.00170256	0.00279097	0.00401676	0.00806493	0.0192225	0.0433681	0.0962962	0.192132	0.342599	0.54259	0.753608	0.955458	1.12688	1.26804	1.38483	1.4846	1.56021	1.62693	1.68733	1.73685	1.77202
Clone 8	0.00579424	0.00486599	0.00225634	0.00104413	0.00189865	0.00433567	0.00405734	0.00139072	4.99373e-05	0.00122054	0.00207789	0.00130377	0.000825945	0	0.000121977	0.00083562	0.000897396	0.000551269	0.000407797	0.00124062	0.00247768	0.00284627	0.00524524	0.0115809	0.0248575	0.0573861	0.121516	0.231934	0.388907	0.573418	0.756845	0.924325	1.06388	1.17794	1.26878	1.34676	1.41561	1.47497	1.52401	1.56161
Clone 9	0.000742536	0.000585331	0.00121097	0.00097676	0.00233471	0.00285416	0.00107622	0	0.000322613	0.00216485	0.00367672	0.00296287	0.00248109	0.0018156	0.000821401	0.00252878	0.00153779	0.000351605	2.34247e-05	0.00097585	0.00334168	0.00720791	0.0143319	0.0274252	0.0615873	0.128966	0.245102	0.411513	0.610527	0.816943	1.00064	1.15416	1.26948	1.36535	1.44435	1.51166	1.57053	1.62175	1.66756	1.69892
Clone 10	0.00312319	0.00276013	0.00227383	0.00225528	0.00304118	0.00292104	0.00166286	0.00241952	0.0036007	0.00240767	0.00134201	0.00110167	0.000417902	0	0.000147776	0.00146774	0.00206919	0.00168473	0.00316679	0.00552107	0.0102566	0.0209733	0.0460903	0.0993023	0.199973	0.359577	0.56372	0.782149	0.991199	1.17072	1.31683	1.43163	1.53435	1.60602	1.66827	1.71813	1.75266	1.78764	1.82425	1.84826
Clone 11	0.00380362	0.00285729	0.00214505	0.0026053	0.00478094	0.00559228	0.00472645	0.00214143	0.00200384	0.00277681	0.00234906	0.00235459	0.0014292	0.000915181	0.000572613	0	0.000714997	0.0023617	0.00178414	0.00208286	0.00564613	0.0077981	0.0107996	0.023137	0.0545806	0.119783	0.233434	0.403421	0.610156	0.826183	1.02485	1.19726	1.33204	1.43615	1.52973	1.60231	1.66971	1.72482	1.77114	1.81661
Clone 12	0.000669058	0	0.000998233	0.00177992	0.00286014	0.00350355	0.00231369	0.0014891	0.00220573	0.00248242	0.00233862	0.00203744	0.00298287	0.00258647	0.00207444	0.00116306	0.000490396	0.00174657	0.00217608	0.0001056	0.0011545	0.00194882	0.005623	0.0101537	0.0241405	0.0577858	0.12175	0.234375	0.400331	0.60825	0.823631	1.01602	1.17938	1.31907	1.43742	1.52709	1.60984	1.67514	1.72804	1.76773
Clone 13	0.00176635	0.000495243	0.000758093	0.00131768	0.00128612	0.00214194	0.00257199	0.00242458	0.00205723	0.00104814	0.00135608	0.00101121	0.000111259	0	0.000201517	0.000689404	0.000876974	0.00111279	0.0016492	0.00411936	0.00981717	0.0203752	0.0457808	0.102499	0.207846	0.375039	0.591804	0.813569	1.03033	1.22723	1.38478	1.51126	1.61642	1.69114	1.75971	1.81256	1.86325	1.89979	1.93635	1.95736
Clone 14	0.00253567	0.0014931	0.00156512	0.00184518	0.00156004	0.00109019	0.00212196	0.00336586	0.00325563	0.0036426	0.00320031	0.00247979	0.00208638	0.00135552	0.000601239	0.000414122	0	0.000355494	4.2223e-05	0.000677352	0.00171642	0.00311312	0.00624392	0.0127325	0.0267863	0.061997	0.131506	0.25964	0.439813	0.656463	0.881736	1.08579	1.25341	1.39064	1.50756	1.60167	1.67939	1.73723	1.80033	1.84995
Clone 15	0.00352832	0.00192112	0.00205659	0.00205076	0.00286915	0.00223163	0.00153704	0.00266212	0.00213386	0	0.000531181	0.000593035	5.9349e-05	0.000993189	0.000496846	0.00186774	0.00270403	0.00124338	0.000611134	0.000942103	0.000503099	0.0021178	0.00523514	0.0122404	0.028176	0.0658994	0.139646	0.265471	0.437553	0.634412	0.831615	1.00493	1.14829	1.26636	1.364	1.44614	1.51793	1.56928	1.62117	1.65685
Clone 16	0.00570938	0.00455736	0.00304	0.00194491	0.00203055	0.00251454	0.0032606	0.00356845	0.00386465	0.00295469	0.00258654	0.00119968	0.000472916	0.00143442	0	0.000113749	0.000542211	0.00250975	0.00421143	0.00631955	0.0118104	0.024447	0.0528644	0.110828	0.219467	0.3891	0.601521	0.824227	1.03199	1.20444	1.34906	1.46096	1.54534	1.61867	1.67233	1.71564	1.75101	1.78314	1.81036	1.83511
Clone 17	0.004474	0.0040199	0.00285847	0.00172967	0.00158191	0.00209897	0.00217693	0.00284751	0.00320937	0.00195912	0.00281984	0.00247431	0.00177583	0.000976584	0.00214325	0.00201241	0.00111202	0.000514869	0	0.00155857	0.00179913	0.00128435	0.0034085	0.00538368	0.00903669	0.0228689	0.0502385	0.109249	0.219426	0.379407	0.583995	0.801566	1.00468	1.17162	1.31216	1.42274	1.52093	1.60539	1.67663	1.71295
Clone 18	0.00198336	0.00238269	0.00248588	0.00246634	0.00245815	0.00181267	0.00195218	0.00243135	0.00301233	0.00143341	0.00188153	0.00158444	0.0017387	0.00104497	0.000905624	0	0.000472971	0.00160723	0.00279843	0.0033733	0.00425879	0.00825246	0.0171151	0.0350189	0.0748507	0.156619	0.29472	0.490444	0.716761	0.937865	1.14104	1.30811	1.4406	1.55468	1.64606	1.72234	1.7772	1.83037	1.87982	1.90599
Clone 19	0.00118721	0.000664825	0.0010034	0.00155703	0.00176308	0.00172189	0.00191333	0.00205936	0.00167398	0.00179634	0.00301242	0.00269445	0.0017413	0.000256903	0	8.49003e-05	0.000657337	0.00159744	0.000753526	0.00131753	0.00190314	0.00409846	0.00827111	0.0161053	0.0365585	0.0807144	0.164993	0.301306	0.480262	0.68149	0.874571	1.03991	1.17929	1.29629	1.38769	1.4709	1.54518	1.60045	1.64224	1.68369
Clone 20	0.000886381	0.000293268	0.00115337	0.000996359	0.00140526	0.00176761	0.00203545	0.00167021	0.00225971	0.00135358	0.000585411	0.000673787	0.0012216	0.00148747	0.0011965	0.000802194	0.000751155	0	0.00128747	0.00174573	0.00311053	0.00701578	0.0159442	0.0343949	0.07904	0.166005	0.312136	0.511988	0.741929	0.968186	1.17004	1.33769	1.47618	1.59041	1.67919	1.75862	1.82814	1.87699	1.92331	1.95401
Clone 21	0.00303564	0.00194164	0.00100628	0.000474762	0.000797591	0.00128123	0.00221507	0.00146236	0.00120143	0.00199847	0.00212442	0.00152216	0.00120418	0.0012978	0.00114203	0.000338663	0	7.64237e-05	0.00022184	0.0038825	0.00853477	0.0188185	0.0407013	0.0879194	0.185539	0.339293	0.544051	0.778168	1.01056	1.21399	1.38378	1.52491	1.63707	1.73245	1.80454	1.86647	1.91541	1.96572	2.0112	2.04074
Clone 22	0.00202602	0.00162339	0.00147485	0.00165855	0.00221668	0.00364287	0.00338814	0.0024381	0.00140568	0.00219246	0.00171371	0.00222326	0.00252983	0.00268546	0.0023351	0.0024566	0.0024011	0.00236119	0.00162921	0	0.00141236	0.00484069	0.00978439	0.0236765	0.0561369	0.120765	0.236461	0.408541	0.619427	0.840617	1.04259	1.21424	1.35754	1.4742	1.57531	1.66078	1.72277	1.78221	1.83326	1.86013
Clone 23	0.00136003	0.00124264	0.00121167	0.00119063	0.00153229	0.00242346	0.00338802	0.00324398	0.00159103	0.00132087	0.000491529	0.00024268	0.000703185	0.0007146	0.00023967	0	0.000969201	0.00148466	0.00134289	0.00116158	0.0015029	0.00189719	0.0042375	0.00857508	0.0208386	0.0491375	0.108122	0.210887	0.366562	0.557867	0.758395	0.94366	1.09324	1.22243	1.33209	1.42333	1.50114	1.57114	1.62767	1.6704
Clone 24	0.00323721	0.00206248	0.00199634	0.00239609	0.00187627	0.00291508	0.00349654	0.00345895	0.00355508	0.00280712	0.00208333	0.00160088	0.00201652	0.00142192	0.000656348	0	0.00042941	0.00083033	0.00144884	0.00164916	0.00265065	0.00376158	0.00597266	0.0095436	0.0173053	0.040185	0.0884793	0.176068	0.313699	0.495877	0.695714	0.885458	1.04769	1.18448	1.29726	1.39274	1.47319	1.53598	1.59104	1.63453
Clone 25	0.00370072	0.00294682	0.00296479	0.00320184	0.00378275	0.00394139	0.00457359	0.00365983	0.00202395	0.00206526	0.00289839	0.00370618	0.00313642	0	0.000359538	0.0012008	0.00101883	0.002055	0.00225641	0.00457077	0.00824778	0.0143651	0.031496	0.0711053	0.149667	0.282178	0.473068	0.700004	0.929155	1.13362	1.30631	1.4451	1.55625	1.649	1.73163	1.78767	1.8443	1.87479	1.90783	1.92917
Clone 26	0.000293454	0	0.000960241	0.00209816	0.00164252	0.00163902	0.00214978	0.00257695	0.00354866	0.00318726	0.00313717	0.00195492	0.0017194	0.000646143	0.00115556	0.00111185	0.000461697	0.000885764	0.000607628	0.00147718	0.00280986	0.00473158	0.00806367	0.0189603	0.0424681	0.0962374	0.19536	0.349993	0.551763	0.769158	0.973113	1.15582	1.29892	1.41626	1.51428	1.59568	1.66557	1.72015	1.76398	1.80988
Clone 27	0.00215294	0.00131373	0.00139267	0.0010541	0.00227783	0.00313962	0.00285133	0.00173615	0.00169826	0.00193544	0.00136248	0.00140622	0.00122353	0.000933389	0	0.00058498	0.000682751	0.000200479	0.00111713	0.00302378	0.00502464	0.0128449	0.0291987	0.064435	0.135617	0.261964	0.445447	0.665603	0.886248	1.08039	1.25473	1.39805	1.50887	1.59666	1.67228	1.72991	1.77252	1.82583	1.87126	1.9026
Clone 28	0.000975806	4.81401e-05	0	0.00117176	0.00303135	0.00420541	0.005075	0.00477259	0.00351319	0.00249049	0.00333049	0.00406281	0.00304669	0.00198515	0.0017337	0.00207445	0.00196399	0.000431251	0.000808211	0.00239833	0.00340743	0.0058378	0.0107339	0.0209433	0.0456896	0.10067	0.207136	0.367046	0.575635	0.801599	1.01583	1.19963	1.35587	1.48333	1.58202	1.67025	1.74163	1.79548	1.84753	1.8873
Clone 29	0.00142073	0.000250275	0.0015403	0.00247851	0.00223565	0.00191599	0.00252861	0.00296646	0.00245708	0.00290531	0.00257876	0.00154251	0.00109735	0	0.000793427	0.000920028	0.00133631	0.00149945	0.0013772	0.00287435	0.00507051	0.0104781	0.025669	0.0596453	0.129943	0.259696	0.455125	0.689058	0.934879	1.16388	1.36421	1.53005	1.66241	1.77213	1.85919	1.92148	1.97977	2.03489	2.06851	2.09009
Clone 30	0.002107	0.00127221	8.66971e-05	0	0.00133756	0.0014247	0.00199374	0.00351202	0.0045261	0.00367002	0.0025547	0.00218282	0.00167252	0.00118388	0.00208799	0.00222001	0.0012047	0.00028959	0.00221014	0.00286609	0.000829065	0.00118955	0.00604584	0.0133837	0.0303609	0.0699077	0.149903	0.284185	0.474031	0.698845	0.922066	1.12867	1.30273	1.44717	1.56073	1.65456	1.72799	1.79828	1.85491	1.89431
Clone 31	0.00155063	0.00142213	0.00153605	0.00240554	0.003537	0.00278268	0.00281619	0.00235385	0.00275425	0.00103649	0.00151793	0.00268488	0.00231603	0.00242267	0.00102403	0	0.000414233	0.00100886	0.0016484	0.00230507	0.00140127	0.0032588	0.00555615	0.012992	0.0310679	0.0709049	0.150516	0.28281	0.469852	0.689142	0.911906	1.10796	1.27854	1.41428	1.52724	1.62036	1.69389	1.7581	1.8156	1.85926
Clone 32	0.0020293	0.00121921	0.00195789	0.0027158	0.00259597	0.00277606	0.00139213	0.00111715	0.00166271	0.00135459	0.000791895	0.00105711	0.00123908	0.00232148	0.00175702	0.000804184	0	0.000647577	0.000546042	0.00116918	0.00280083	0.00545357	0.0102261	0.0221143	0.0492781	0.110209	0.217581	0.376521	0.575868	0.78753	0.986458	1.15467	1.28865	1.39377	1.48276	1.5551	1.62477	1.6775	1.71897	1.75624
WT	0.00377194	0.00347235	0.00323636	0.00395461	0.0049375	0.00562124	0.0057278	0.00682051	0.00773435	0.00895996	0.0085861	0.0076215	0.00805958	0.00958393	0.00897517	0.00826687	0.00896238	0.0105796	0.010379	0.0101807	0.00936211	0.00885975	0.00885389	0.00876676	0.00783769	0.00643708	0.00407866	0.00216405	0	0.00276814	0.0164334	0.0434173	0.087165	0.144098	0.207943	0.276132	0.339092	0.401898	0.463252	0.513939
Pos	0.001764	0.00104924	0.00141731	0.00291615	0.00252603	0.00154716	0.00247174	0.00332523	0.00271708	0.00224154	0.00228093	0.00121656	0.00239213	0.00122392	0.000574551	0.000267815	0	0.000362087	0.000391044	0.00201276	0.00353937	0.00629849	0.0133859	0.0306194	0.0688497	0.14522	0.272449	0.449614	0.660143	0.870157	1.05371	1.20811	1.33307	1.43866	1.5232	1.5937	1.6553	1.71092	1.75516	1.78783
Neg	0	0	0	0	0	0	0	0	0	0	0	0	0	0	0	0	0	0	0	0	0	0	0	0	0	0	0	0	0	0	0	0	0	0	0	0	0	0	0	0

## Sheet: B
Presence/absence data for mNG2(1-10)
Sample	Delta Rn	Result
Clone 1	1.57299	Present
Clone 2	1.60672	Present
Clone 3	1.69184	Present
Clone 4	1.85071	Present
Clone 5	1.79167	Present
Clone 6	2.01274	Present
Clone 7	1.76845	Present
Clone 8	1.55582	Present
Clone 9	1.69817	Present
Clone 10	1.84514	Present
Clone 11	1.81281	Present
Clone 12	1.76706	Present
Clone 13	1.95559	Present
Clone 14	1.84742	Present
Clone 15	1.65332	Present
Clone 16	1.8294	Present
Clone 17	1.70847	Present
Clone 18	1.90401	Present
Clone 19	1.68251	Present
Clone 20	1.95312	Present
Clone 21	2.03771	Present
Clone 22	1.8581	Present
Clone 23	1.66904	Present
Clone 24	1.63129	Present
Clone 25	1.92547	Present
Clone 26	1.80959	Present
Clone 27	1.90045	Present
Clone 28	1.88633	Present
Clone 29	2.08866	Present
Clone 30	1.89221	Present
Clone 31	1.85771	Present
Clone 32	1.75421	Present
WT cells	0.510167	Absent
Positive control	1.78607	Present

## Sheet: C
AmpR normalized amplification curves
Sample	1	2	3	4	5	6	7	8	9	10	11	12	13	14	15	16	17	18	19	20	21	22	23	24	25	26	27	28	29	30	31	32	33	34	35	36	37	38	39	40
Clone 1	0.00472903	0.00415309	0.0033556	0.00250683	0.00280053	0.00350369	0.00385591	0.00283965	0.00225223	0.00244762	0.00210281	0.00107907	0.000153841	0	0.00122569	0.00160624	0.00125898	0.00113527	0.00121463	0.000921332	0.00252315	0.00393408	0.00747064	0.013343	0.0266071	0.0576739	0.12096	0.219723	0.338384	0.457897	0.558911	0.64109	0.708201	0.765848	0.820868	0.868531	0.913247	0.953059	0.992847	1.03002
Clone 2	0.00386269	0.00360821	0.00435557	0.0045358	0.00546605	0.00549795	0.00589033	0.00640019	0.00583289	0.00729076	0.00761065	0.00842685	0.00852411	0.00807668	0.00741951	0.00862555	0.00895651	0.00871891	0.00975345	0.0102532	0.011106	0.011099	0.0109649	0.00953506	0.00873877	0.00762733	0.00534472	0.00322547	0.000899639	0	0.000479016	0.0034365	0.00781381	0.0127812	0.0196081	0.0268702	0.0328953	0.0396237	0.0473739	0.0514895
Clone 3	0.00417298	0.0033602	0.00226119	0.00219384	0.00249638	0.00209704	0.00194074	0.00160701	0.00117682	0.00119304	0.00025689	0	0.00305863	0.00326882	0.00191717	0.00180649	0.00205819	0.00175217	0.000577504	0.00104851	0.00217912	0.00329345	0.00637533	0.0131037	0.028109	0.0613073	0.125669	0.227214	0.350147	0.469501	0.572563	0.656935	0.730089	0.789846	0.841897	0.893072	0.939161	0.98253	1.02461	1.0597
Clone 4	0.00271268	0.00222247	0.00235674	0.00270472	0.00293566	0.00394167	0.00523009	0.00542816	0.00567343	0.00644737	0.00611303	0.00592258	0.00551157	0.0057949	0.00631975	0.00569836	0.00624933	0.00607307	0.00561303	0.00622621	0.0069492	0.00700376	0.00630899	0.00590316	0.00598047	0.00506371	0.00392805	0.00136928	0	0.00198139	0.00610671	0.0125428	0.0193652	0.0291144	0.0366127	0.0446137	0.0525206	0.0608545	0.068097	0.0717672
Clone 5	0.00624213	0.00659298	0.00690767	0.00677405	0.00766149	0.00856487	0.00878593	0.00932614	0.00962326	0.00913869	0.0086288	0.00978835	0.0100147	0.0101467	0.0101521	0.0101683	0.0102635	0.0114281	0.0115428	0.0124278	0.0124966	0.0110726	0.0109164	0.0104761	0.0109487	0.00948465	0.00570135	0.00334269	0.00157821	0	0.000850142	0.00219943	0.00385428	0.00625564	0.00940019	0.0109159	0.014382	0.0169485	0.0166279	0.0169598
Clone 6	0.00149027	0.00108215	0.000608395	0.00109383	0.00125366	0.00171526	0.0020642	0.00157708	0.00108768	0.00116604	0.00111154	0.000907563	0.000746558	0.000403326	0.000541416	0.000978424	0	0.00147313	0.00299642	0.00671113	0.0132766	0.0254946	0.0527492	0.109535	0.207462	0.338684	0.475726	0.595619	0.692996	0.773352	0.844513	0.9027	0.95814	1.00258	1.04458	1.08608	1.1284	1.16483	1.20076	1.22259
Clone 7	0.00139608	0.00141551	0.00180013	0.00285547	0.00329324	0.00434294	0.00442561	0.00369686	0.00399475	0.0041363	0.00437687	0.00568234	0.00549619	0.00480256	0.004954	0.00576132	0.00609676	0.00539405	0.00492533	0.00533133	0.00605365	0.00696332	0.00779637	0.00634645	0.0050626	0.00401559	0.0016618	6.58873e-05	0	0.00356618	0.0113456	0.0203991	0.0297776	0.0394885	0.049265	0.061074	0.071822	0.0811571	0.0912901	0.0970228
Clone 8	0.0120511	0.0115934	0.0115565	0.0117624	0.012071	0.0121567	0.0127894	0.0132322	0.0132263	0.013505	0.0132853	0.0131976	0.0134086	0.0137033	0.0140607	0.0146272	0.0147308	0.0146059	0.0141943	0.0142471	0.0141297	0.0149084	0.0150297	0.0136919	0.0133438	0.0117272	0.00782601	0.00414848	0.0011812	0	0.000457804	0.00224141	0.00443435	0.00806467	0.0119002	0.0170307	0.0217066	0.0254903	0.0292232	0.0313239
Clone 9	0.000692916	0.00103754	0.00178925	0.00216304	0.00204229	0.0014256	0.00147683	0.00203587	0.00236232	0.0018331	0.00217266	0.00187123	0.00027036	0	0.000504382	0.00141098	0.001142	0.00117573	0.0017147	0.00231467	0.00377763	0.00866261	0.0166731	0.0330532	0.0714233	0.142081	0.246323	0.366591	0.480568	0.570332	0.648028	0.713505	0.764175	0.814029	0.860964	0.903367	0.944786	0.980351	1.01526	1.05412
Clone 10	0.00526362	0.00404062	0.00324069	0.00294974	0.00190906	0.000946896	0.000713784	0.00118991	0.00157221	0.00134093	0.000242483	0.000278739	0	0.000533046	0.0009767	0.000633782	0.00146192	0.00135448	0.00136275	0.0054021	0.0106947	0.0207035	0.0426758	0.0875264	0.171339	0.296918	0.437951	0.562056	0.666544	0.75935	0.827169	0.882158	0.935243	0.975387	1.00958	1.05194	1.085	1.1165	1.14507	1.1711
Clone 11	0.00198854	0.00162273	0.00175665	0.00252829	0.00326292	0.00375005	0.00371783	0.00400257	0.00457639	0.00404473	0.00449172	0.00572634	0.00567448	0.00515453	0.00539153	0.00494973	0.00439027	0.00577325	0.0067518	0.00651269	0.00597137	0.00533589	0.00571257	0.00617524	0.00488111	0.00381559	0.00174174	0.000974212	0	0.00120379	0.00576069	0.00979931	0.0147341	0.0200186	0.0270321	0.0332909	0.0398763	0.0475302	0.0521052	0.0547666
Clone 12	0.00176827	0.00101429	0.00234912	0.00253775	0.00256964	0.0021279	0.00211294	0.00182822	0.00190078	0.00111802	0.000992338	0.00179414	0.00102761	0.000275915	0.000406	0.000155093	0	0.000590531	0.000753385	0.00152488	0.00356565	0.00592606	0.0107438	0.0216141	0.0489992	0.103036	0.195414	0.315378	0.441475	0.553075	0.648221	0.723713	0.786979	0.84365	0.902131	0.955194	0.999224	1.04225	1.07944	1.11028
Clone 13	0.000982775	0.000610453	0.00071318	0.00178611	0.0017563	0.00125723	0.00128985	0.00175826	0.00168119	0.00119765	0.0010464	0.00124792	0.00056819	6.53185e-05	0.000346442	0.000216785	1.99543e-05	0	0.00192414	0.00445895	0.00795802	0.0166636	0.0343511	0.0717128	0.14447	0.256879	0.395103	0.527526	0.640928	0.734176	0.807948	0.871034	0.927104	0.979941	1.02319	1.06199	1.10313	1.1454	1.18397	1.21167
Clone 14	0.000969395	0.000776917	0.00135794	0.00190473	0.00243356	0.00254518	0.00291764	0.0030623	0.00226084	0.00217822	0.00228938	0.00280976	0.00231899	0.00106732	0.00111694	3.83845e-05	0	0.000132219	0.000919344	0.00132229	0.00207504	0.0034961	0.00568759	0.0124622	0.0297478	0.0657421	0.132026	0.233519	0.354159	0.466708	0.565059	0.641564	0.704983	0.763543	0.814616	0.85662	0.898763	0.944195	0.985289	1.0175
Clone 15	0.00288967	0.00275102	0.00178277	0.00146482	0.0016659	0.00185528	0.00128153	0.00135492	0.00119857	0.00146332	0.00188789	0	3.59422e-05	0.00042458	0.000258254	0.000509086	0.000343847	0.000323374	0.000247557	0.00055774	0.00217812	0.00495339	0.0108795	0.0243039	0.0543953	0.113245	0.205126	0.319719	0.430523	0.525563	0.601602	0.665393	0.722656	0.768544	0.814984	0.855775	0.892854	0.931367	0.966704	0.992948
Clone 16	0.00429869	0.00324156	0.00292009	0.00250667	0.00196407	0.00203779	0.00257664	0.00185362	0.00161272	0.00121785	0.00192039	0.00192504	0.000952495	0.000918144	0.000109528	0	0.000444572	0.00138094	0.00311016	0.00619752	0.00907593	0.0177829	0.0358692	0.0732683	0.145329	0.263457	0.408035	0.544926	0.659642	0.751457	0.823437	0.884894	0.937777	0.986845	1.02861	1.06456	1.10068	1.13482	1.16892	1.1971
Clone 17	0.000978218	0.001076	0.00251288	0.00287414	0.00191381	0.00179408	0.00103075	0.000930808	0.00183421	0.00320941	0.00378875	0.00415344	0.00342572	0.00287432	0.00296835	0.00234649	0.00278965	0.0042021	0.0050325	0.00521753	0.00511068	0.0053223	0.00425045	0.00324288	0.00309755	0.00232322	0.00202563	0.0012631	3.15108e-05	0	0.00368022	0.0138087	0.0328016	0.0572219	0.0824459	0.11024	0.136718	0.165251	0.192876	0.215812
Clone 18	0.000588956	0.000158626	0.00177156	0.00176524	0.00173015	0.00164706	0.00131635	0.0014085	0.00115792	0.00102317	0	0.000989677	0.000958117	0.00103639	0.000852217	0.00105455	0.000694506	0.000810766	0.00126449	0.00195501	0.00301787	0.00639704	0.013563	0.0260251	0.0532871	0.112619	0.214147	0.346189	0.479362	0.59744	0.695619	0.775592	0.84177	0.903118	0.954687	0.999556	1.04005	1.07906	1.12031	1.14986
Clone 19	0.00106463	0.00101639	0.00184598	0.00188079	0.003439	0.00412993	0.00450018	0.00396041	0.00428305	0.00430309	0.00465137	0.00472835	0.00490766	0.00561198	0.00542877	0.00510107	0.00484218	0.0052192	0.00527718	0.00514547	0.00553222	0.00529465	0.00542101	0.00496855	0.00542671	0.00310118	0.000352653	0	0.00127248	0.00372813	0.00810959	0.0135016	0.0200278	0.0266211	0.034937	0.0430316	0.0507172	0.0588934	0.0640093	0.0654319
Clone 20	0.00180892	0.00129084	0.00238471	0.00235647	0.00211882	0.00293603	0.00240121	0.00247651	0.00262585	0.00224181	0.00109141	0.00111565	0.00135305	0.00141748	0.00148302	0.00092772	0	7.22224e-05	0.000965365	0.00228928	0.00369184	0.00568646	0.0112386	0.023968	0.0490773	0.103978	0.196029	0.318854	0.44802	0.564143	0.65944	0.739537	0.807042	0.869686	0.923702	0.972136	1.01997	1.06633	1.10632	1.13435
Clone 21	0.00127358	0.000592847	0.000909454	0.000742041	0.0014514	0.00191232	0.0019021	0.00173719	0.00167604	0.000982899	0.000684609	0.000699318	0.000254922	0.000933106	0.000866633	0.000127195	0	0.000339331	0.00196581	0.00356168	0.00636066	0.0150684	0.0319385	0.0667135	0.136014	0.24959	0.392246	0.533913	0.658111	0.758289	0.838433	0.90513	0.962438	1.01585	1.066	1.11203	1.15937	1.19667	1.23561	1.26713
Clone 22	0.0128524	0.0127987	0.0130027	0.0133459	0.0128171	0.0128006	0.012826	0.0135791	0.0132028	0.0130199	0.0125693	0.0127929	0.0133536	0.0130322	0.0124495	0.0124632	0.0116948	0.0118027	0.0116899	0.0115219	0.0112003	0.0107731	0.00962671	0.00945431	0.00810829	0.00637768	0.00374611	0.00150158	0.00107363	0	0.00109374	0.00417764	0.00772388	0.0113748	0.0148677	0.0186137	0.0226832	0.0248568	0.0263418	0.0272004
Clone 23	0.000885546	0.000250413	0.00113249	0.00166057	0.00187629	0.00165416	0.00219788	0.00255983	0.00326796	0.00326944	0.00234352	0.00151749	0.000673638	0	0.000744863	0.000920726	0.000550192	0.000514264	0.00114418	0.000954085	0.00234733	0.00546525	0.0105386	0.0235087	0.0513686	0.107385	0.200965	0.319645	0.439709	0.54485	0.629995	0.702076	0.763769	0.819904	0.869827	0.914419	0.961352	1.00603	1.0427	1.07643
Clone 24	0.00297181	0.00193411	0.00159191	0.00208117	0.00235304	0.0024696	0.00233493	0.00175272	0.00113182	0.00111916	0.00128386	0.000697131	0.000329565	0.000794869	0.000518216	1.74034e-05	0	0.00010644	0.00106003	0.00171671	0.00195496	0.00230995	0.00474619	0.0100953	0.023007	0.0508079	0.105759	0.198031	0.3147	0.427563	0.523343	0.606768	0.676454	0.73539	0.787531	0.835692	0.88247	0.921642	0.960969	0.990996
Clone 25	0.00167267	0.00113899	0.00152369	0.00135356	0.00197335	0.00181375	0.00204575	0.00220846	0.00232656	0.00158156	0.000891835	0.000651665	0.000813201	0.000106521	0	0.00173711	0.00216244	0.00141112	0.0014884	0.00348446	0.00773823	0.0156617	0.0310649	0.0647081	0.13176	0.24194	0.380918	0.522672	0.643661	0.738946	0.816938	0.882899	0.936463	0.993042	1.03903	1.0821	1.11711	1.14958	1.18363	1.20868
Clone 26	0.00183192	0.00193484	0.00121093	0	2.75807e-05	0.00229583	0.00439348	0.00490978	0.00548767	0.00555702	0.00485974	0.00472285	0.00366631	0.00262311	0.00149702	0.00104223	0.000612033	0.00095142	0.00150541	0.00228301	0.00261179	0.00477779	0.00991014	0.0226015	0.0524708	0.110766	0.205478	0.323897	0.43723	0.535212	0.618149	0.687692	0.746518	0.79735	0.844927	0.884198	0.931029	0.970306	1.00919	1.03823
Clone 27	0.000274524	0	0.00277916	0.0119869	0.0130465	0.0128833	0.0123263	0.0115417	0.0112135	0.0107493	0.00993403	0.0100866	0.0096048	0.00911701	0.00849863	0.00894255	0.00949668	0.00925943	0.00955466	0.0104253	0.0133305	0.0186372	0.0300245	0.0557648	0.109544	0.203022	0.329387	0.463978	0.582656	0.682536	0.766102	0.834102	0.893769	0.945167	0.989507	1.03207	1.07484	1.11175	1.15185	1.18159
Clone 28	0.00150576	0.00119815	0.00134798	0.0016383	0.00160455	0.00242847	0.00286067	0.00366071	0.00364969	0.00310591	0.00380665	0.00361248	0.00355969	0.00380779	0.00361378	0.00364799	0.00410806	0.00442601	0.00450217	0.00510433	0.00469161	0.00373124	0.00255431	0.00328334	0.00316162	0.00330864	0.00218296	0.000941238	0	0.000761041	0.00386411	0.00782971	0.012733	0.0178462	0.0250585	0.0307385	0.0357223	0.041011	0.0466949	0.0483947
Clone 29	0.00198885	0.00115892	0.0020394	0.00311327	0.00274353	0.00237271	0.00268823	0.0022163	0.00192673	0.00209515	0.00179721	0.00197212	0.00257634	0.000870568	0.00062463	0.000741908	0	0.000964618	0.00212171	0.00337209	0.00600004	0.0101954	0.0210814	0.0433224	0.0885528	0.175726	0.309895	0.471434	0.620243	0.75192	0.858727	0.943888	1.01559	1.08078	1.13967	1.18741	1.2347	1.27888	1.31746	1.35043
Clone 30	0.00155296	0.00145796	0.00175879	0.0022327	0.00357156	0.00411507	0.00371168	0.00490092	0.00513605	0.00466075	0.0051636	0.00487134	0.00538497	0.00520858	0.00515478	0.00510428	0.00584103	0.0062651	0.0068757	0.00682489	0.00636938	0.00568629	0.00624603	0.00523213	0.00464171	0.00374312	0.00317884	0.000969865	0	0.000887833	0.00303791	0.00809664	0.0142986	0.0211957	0.0266655	0.0327317	0.0405023	0.0478913	0.0548519	0.0598681
Clone 31	0.00166635	0.00200637	0.00233598	0.00256048	0.00277996	0.00391764	0.00392189	0.00411267	0.00483045	0.00495775	0.00518749	0.00538252	0.00526398	0.00629886	0.00699881	0.00586681	0.0049264	0.00544796	0.00685844	0.00697645	0.0069251	0.00606117	0.00682474	0.00657243	0.00627129	0.00528154	0.00357396	0.00194851	0.00031231	0	0.001582	0.00555351	0.0116945	0.0179011	0.0244802	0.0320575	0.0396129	0.0473351	0.0549058	0.0584737
Clone 32	0.0150508	0.014195	0.0134104	0.0137357	0.0133458	0.013531	0.0134054	0.0129574	0.0131878	0.0134723	0.0116877	0.0113528	0.0103486	0.00973662	0.00966235	0.00938475	0.00840045	0.00857247	0.00931647	0.0084654	0.00687253	0.00818881	0.0188957	0.0200355	0.0189416	0.0161868	0.0123558	0.00691111	0.00320404	0.000656713	0	0.00183129	0.00496974	0.00721801	0.00985358	0.0135155	0.0188934	0.0231948	0.0270849	0.0271118
WT	0.00160723	0.000810694	0.00026593	9.6482e-05	0.000111317	0.00152321	0.00141828	0.00162457	0.0017214	0.00245431	0.00347083	0.00233486	0.00212831	0.00241582	0.00121916	0.0003714	0.000745993	0.000391308	0.0011449	0.00194051	0.00164801	0.00136644	0.00185425	0.000923506	0	0.00069014	0.000722737	0.00256499	0.00778349	0.0179372	0.0346077	0.0546036	0.0753473	0.0937116	0.112891	0.129295	0.147994	0.166251	0.181827	0.195198
Pos	0.00120265	0.000574787	0.000784132	0.000629561	0.000869618	0.00238822	0.00226117	0.00121511	0.00107692	0.00152066	0.00150882	0.00133674	0.000834589	0.00142129	0.00144601	0.000566737	0	0.000198944	0.00048728	0.0011983	0.00355382	0.00774596	0.0146455	0.0331952	0.071512	0.143323	0.250185	0.372965	0.487817	0.582173	0.663883	0.732068	0.792159	0.846508	0.897809	0.947393	0.99009	1.02771	1.06711	1.10176
Neg	0	0	0	0	0	0	0	0	0	0	0	0	0	0	0	0	0	0	0	0	0	0	0	0	0	0	0	0	0	0	0	0	0	0	0	0	0	0	0	0

## Sheet: D
Presence/absence data for the AmpR gene
Sample	Delta Rn	Result
Clone 1	1.02529	Present
Clone 2	0.0476268	Absent
Clone 3	1.05553	Present
Clone 4	0.0690545	Absent
Clone 5	0.0107176	Absent
Clone 6	1.2211	Present
Clone 7	0.0956268	Absent
Clone 8	0.0192728	Absent
Clone 9	1.05343	Present
Clone 10	1.16584	Present
Clone 11	0.0527781	Absent
Clone 12	1.10852	Present
Clone 13	1.21069	Present
Clone 14	1.01653	Present
Clone 15	0.990059	Present
Clone 16	1.1928	Present
Clone 17	0.214834	Absent
Clone 18	1.14927	Present
Clone 19	0.0643672	Absent
Clone 20	1.13254	Present
Clone 21	1.26586	Present
Clone 22	0.014348	Absent
Clone 23	1.07554	Present
Clone 24	0.988024	Present
Clone 25	1.20701	Present
Clone 26	1.0364	Present
Clone 27	1.18132	Present
Clone 28	0.046889	Absent
Clone 29	1.34844	Present
Clone 30	0.0583151	Absent
Clone 31	0.0568074	Absent
Clone 32	0.012061	Absent
WT cells	0.193591	Absent
Positive control	1.10056	Present
