# Supplementary material for: Endogenous tagging using split mNeonGreen in human iPSCs for live imaging studies
Source: eLife. 2024 Apr 23;12:RP92819. doi: 10.7554/eLife.92819 (PMC11037917; doi:10.7554/eLife.92819)
Supplement: Figure 1—figure supplement 2—source data 1. [file elife-92819-fig1-figsupp2-data1.xlsx]

## Sheet: A
Gene copy number quantification
Cell line	Gene of interest	Gene concentration (copies/μL)	Reference gene	Reference gene concentration (copies/μL)	Gene of interest copies per genome
WT	mNG2(1-10)	1.173	Rnase P	338.64	0.00692771
WT	AmpR	27.993	Rnase P	581.27	0.0963167
smNG2-P	mNG2(1-10)	361.64	Rnase P	710.77	1.0176
smNG2-P	AmpR	22.463	Rnase P	1095	0.0410283
