# Supplementary material for: Endogenous tagging using split mNeonGreen in human iPSCs for live imaging studies
Source: eLife. 2024 Apr 23;12:RP92819. doi: 10.7554/eLife.92819 (PMC11037917; doi:10.7554/eLife.92819)
Supplement: Figure 2—figure supplement 1—source data 1. [file elife-92819-fig2-figsupp1-data1.xlsx]

## Sheet: U
Tagged cell mean fluorescence intensity
Sample	MFI
ACTB	29883.9
TUBA1B	7170.53
KRT18	1895.72
RHOA	1616.5
NES	1098.58
H2BC11	1027.91
TUBB3	806.765
ANLN	638.664
SOX2	636.683
CDH1	NA
RACGAP1	NA
NCAM1	NA
FOXA2	NA
PAX6	NA
TBXT	NA
KRT5	NA
KRT14	NA
Negative	NA
Untransfected	NA
