# Supplementary material for: Endogenous tagging using split mNeonGreen in human iPSCs for live imaging studies
Source: eLife. 2024 Apr 23;12:RP92819. doi: 10.7554/eLife.92819 (PMC11037917; doi:10.7554/eLife.92819)
Supplement: Figure 2—source data 1. [file elife-92819-fig2-data1.xlsx]

## Sheet: B
CRISPResso2 raw data
Amplicon	Unmodified%	Modified%	Reads_in_input	Reads_aligned_all_amplicons	Reads_aligned	Unmodified	Modified
H2BC11 WT	30.6177	69.3823	1539	1393	1117	342	775
H2BC11 HDR	38.7681	61.2319	1539	1393	276	107	169
ACTB WT	66.0942	33.9058	2882	2306	2271	1501	770
ACTB HDR	85.7143	14.2857	2882	2306	35	30	5
TUBA1B WT	85.4839	14.5161	1928	1748	1736	1484	252
TUBA1B HDR	0	100	1928	1748	12	0	12
ANLN WT	60.4956	39.5044	2656	2204	2058	1245	813
ANLN HDR	60.274	39.726	2656	2204	146	88	58
RHOA WT	48.3582	51.6418	1916	1769	1675	810	865
RHOA HDR	41.4894	58.5106	1916	1769	94	39	55
RACGAP1 WT	49.3544	50.6456	2643	2437	2401	1185	1216
RACGAP1 HDR	30.5556	69.4444	2643	2437	36	11	25
KRT18 WT	35.5435	64.4565	3401	2785	2760	981	1779
KRT18 HDR	80	20	3401	2785	25	20	5
KRT5 WT	33.677	66.323	2095	1629	1164	392	772
KRT5 HDR	57.2043	42.7957	2095	1629	465	266	199
KRT14 WT	51.8251	48.1749	2782	2389	2356	1221	1135
KRT14 HDR	36.3636	63.6364	2782	2389	33	12	21
CDH1 WT	16.2184	83.7816	2403	1962	1227	199	1028
CDH1 HDR	59.4558	40.5442	2403	1962	735	437	298
SOX2 WT	74.0515	25.9485	2560	2263	2135	1581	554
SOX2 HDR	62.5	37.5	2560	2263	128	80	48
PAX6 WT	14.6617	85.3383	2483	1969	1330	195	1135
PAX6 HDR	53.6776	46.3224	2483	1969	639	343	296
NES WT	56.5217	43.4783	1874	1643	1610	910	700
NES HDR	60.6061	39.3939	1874	1643	33	20	13
TUBB3 WT	70.2086	29.7914	1941	1574	1534	1077	457
TUBB3 HDR	60	40	1941	1574	40	24	16
TBXT WT	36.4969	63.5031	2501	1909	1296	473	823
TBXT HDR	49.9184	50.0816	2501	1909	613	306	307
NCAM1 WT	65.1043	34.8957	3554	3339	3115	2028	1087
NCAM1 HDR	28.125	71.875	3554	3339	224	63	161
FOXA2 WT	24.0927	75.9073	2357	1942	1295	312	983
FOXA2 HDR	51.1592	48.8408	2357	1942	647	331	316
Allele frequencies
Locus	WT (%)	Indels (%)	HDR (%)	Imperfect HDR (%)	Total HDR (%)
H2BC11	24.5513	55.6353	7.68126	12.1321	19.8134
ACTB	65.0911	33.3912	1.30095	0.216826	1.51778
TUBA1B	84.897	14.4165	0	0.686499	0.686499
ANLN	56.4882	36.8875	3.99274	2.63158	6.62432
RHOA	45.7886	48.8977	2.20464	3.1091	5.31374
RACGAP1	48.6254	49.8974	0.451375	1.02585	1.47723
KRT18	35.2244	63.8779	0.718133	0.179533	0.897666
KRT5	24.0638	47.391	16.329	12.2161	28.5451
KRT14	51.1093	47.5094	0.502302	0.879029	1.38133
CDH1	10.1427	52.3955	22.2732	15.1886	37.4618
SOX2	69.863	24.4808	3.53513	2.12108	5.65621
PAX6	9.9035	57.6435	17.42	15.033	32.453
NES	55.3865	42.605	1.21729	0.791236	2.00852
TUBB3	68.4244	29.0343	1.52478	1.01652	2.5413
TBXT	24.7774	43.1116	16.0293	16.0817	32.1111
NCAM1	60.7367	32.5547	1.88679	4.8218	6.7086
FOXA2	16.0659	50.6179	17.0443	16.2719	33.3162
