# Supplementary material for: Endogenous tagging using split mNeonGreen in human iPSCs for live imaging studies
Source: eLife. 2024 Apr 23;12:RP92819. doi: 10.7554/eLife.92819 (PMC11037917; doi:10.7554/eLife.92819)
Supplement: Figure 3—figure supplement 1—source data 1. [file elife-92819-fig3-figsupp1-data1.xlsx]

## Sheet: A
Clone recovery rate
Sample	Recovered clones	Total cells sorted	Recovery rate (%)
smNG2-P	37	47	78.7234
H2BC11-smNG2	74	96	77.0833
smNG2-ACTB	56	96	58.3333
smNG2-TUBA1B	60	96	62.5
smNG2-ANLN	71	96	73.9583
smNG2-RHOA	34	96	35.4167

## Sheet: H
Clone fluorescence intensity
Clone	Cell	Mean nuclear fluorescence intensity
15	1	901.691
15	2	1047.91
15	3	1323.01
15	4	1341.67
15	5	681.131
15	6	746.471
15	7	481.391
15	8	1311.55
15	9	1000.79
15	10	783.098
15	11	633.341
15	12	639.242
15	13	670.549
15	14	604.753
15	15	523.516
15	16	353.894
15	17	266.047
15	18	523.874
15	19	189.643
15	20	1078.86
15	21	766.162
15	22	947.626
15	23	1249.85
15	24	602.744
15	25	507.514
15	26	576.304
15	27	963.377
15	28	1383.06
15	29	582.997
15	30	884.378
15	31	1082.44
15	32	1159.14
15	33	872.453
15	34	996.853
15	35	1108.75
15	36	489.191
15	37	715.083
15	38	670.525
15	39	946.262
15	40	770.573
15	41	948.628
15	42	471.251
15	43	652.57
15	44	502.506
15	45	898.103
15	46	602.116
15	47	429.105
15	48	323.612
15	49	836.84
15	50	672.557
15	51	568.671
15	52	560.038
15	53	994.573
15	54	884.04
15	55	436.946
15	56	430.782
15	57	695.918
15	58	759.709
15	59	649.929
15	60	1066.52
15	61	884.165
15	62	290.141
15	63	545.814
15	64	138.158
15	65	353.926
15	66	93.645
15	67	295.36
15	68	903.673
15	69	398.706
15	70	636.747
15	71	992.423
15	72	871.268
15	73	745.705
15	74	829.92
15	75	497.162
15	76	785.296
15	77	932.293
15	78	715.066
15	79	400.571
15	80	461.401
15	81	482.912
15	82	545.253
15	83	523.527
15	84	688.545
15	85	995.397
15	86	671.224
15	87	714.518
15	88	707.636
15	89	336.182
15	90	654.004
15	91	898.602
15	92	614.974
15	93	618.282
15	94	694.988
15	95	892.81
15	96	983.753
15	97	608.054
15	98	824.989
15	99	351.916
15	100	756.284
15	101	1368.17
15	102	633.371
15	103	546.029
15	104	447.576
15	105	843.427
15	106	717.464
15	107	879.223
15	108	688.928
15	109	538.55
15	110	931.914
15	111	780.132
15	112	958.416
15	113	675.925
15	114	601.098
15	115	764.335
15	116	243.688
15	117	378.474
15	118	679.079
15	119	304.882
15	120	265.208
8	1	2216.75
8	2	1215.27
8	3	899.519
8	4	2005.21
8	5	1847.48
8	6	1853.38
8	7	1532.41
8	8	1788.8
8	9	2095.19
8	10	1654.8
8	11	1507.74
8	12	1539.63
8	13	1990.96
8	14	1835.35
8	15	3156.65
8	16	2384.47
8	17	2079.12
8	18	1150.89
8	19	1470.97
8	20	1689.59
8	21	3165.62
8	22	2189.25
8	23	2079.47
8	24	1363.94
8	25	3018.9
8	26	1687.08
8	27	1783.13
8	28	1525.84
8	29	1260.78
8	30	1070.59
8	31	977.978
8	32	1420.39
8	33	701.739
8	34	747.928
8	35	1921.46
8	36	1883.59
8	37	1455.9
8	38	1710.59
8	39	1487.75
8	40	1851.64
8	41	726.005
8	42	1360.37
8	43	1274.32
8	44	896.865
8	45	1100.05
8	46	1503.3
8	47	954.719
8	48	229.486
8	49	1054.2
8	50	1585.65
8	51	1521.37
8	52	1192.36
8	53	1392.65
8	54	1942.7
8	55	1397.76
8	56	1257.43
8	57	904.089
8	58	2343.23
8	59	1518.46
8	60	891.865
8	61	938.799
8	62	733.491
8	63	1038.56
8	64	1365.79
8	65	1606.04
8	66	1660.06
8	67	2283.28
8	68	1467.33
8	69	1159
8	70	841.629
8	71	1963.15
8	72	1395.25
8	73	1371.96
8	74	1724.19
8	75	920.018
8	76	875.543
8	77	794.555
8	78	898.893
8	79	1364.73
8	80	1324.91
8	81	3425.94
8	82	1225.94
8	83	1232.89
8	84	1105.9
8	85	1581.29
8	86	2447.51
8	87	2029.4
8	88	1050.41
8	89	1643.3
8	90	1593.32
8	91	787.881
8	92	851.306
8	93	593.459
8	94	1321.02
8	95	746.155
8	96	1371.47
8	97	1875.22
8	98	1871.85
8	99	946.044
8	100	821.236
8	101	1517.76
8	102	1088.05
8	103	1763.11
8	104	1441.31
8	105	972.076
8	106	845.089
8	107	1483.73
8	108	1137.94
8	109	1415.55
8	110	1011.77
8	111	1133.87
8	112	723.523
Summary statistics
Clone	Average fluorescence intensity	Standard deviation
15	702.861	270.266
8	1455.78	558.352

## Sheet: I
Clone fluorescence intensity
Clone	Cell	Mean nuclear fluorescence intensity
3	1	3132.92
3	2	3247.54
3	3	3604.04
3	4	3941.13
3	5	3517.63
3	6	3361.7
3	7	2283.19
3	8	3712.88
3	9	3437.72
3	10	2012.14
3	11	3471.33
3	12	2096.29
3	13	4078.59
3	14	5138.79
3	15	3965.49
3	16	3767.1
3	17	3624.39
3	18	3520.95
3	19	3092.12
3	20	2664.31
3	21	3760.25
3	22	4097.56
3	23	3360.4
3	24	3219.26
3	25	2649.78
3	26	5499.69
3	27	4759.81
3	28	6396.08
3	29	3309.88
3	30	3938.92
3	31	3821.02
3	32	2849.35
3	33	3037.61
3	34	3985.46
3	35	2942.52
3	36	5726.61
3	37	4983.25
3	38	4149.7
3	39	5553.61
3	40	5016.64
3	41	5294.81
3	42	4736.89
3	43	3761.43
3	44	3189.19
3	45	3909.85
3	46	4276.83
3	47	4049.39
3	48	4604.97
3	49	3535.31
3	50	2876.58
3	51	3548.12
3	52	4131.41
3	53	3092.49
3	54	4071.16
3	55	3428.86
3	56	4021.21
3	57	5406.88
3	58	5539.82
3	59	4347.38
3	60	4399.9
3	61	4425.76
3	62	4367.87
3	63	4138.21
3	64	3487.74
3	65	3370.96
3	66	4576.83
3	67	5775.2
3	68	5006.45
3	69	3139.01
3	70	4043.46
3	71	5293.43
3	72	4043.52
3	73	4339.3
3	74	5975.08
3	75	4333.22
3	76	2317.79
3	77	2617.73
3	78	3166.22
3	79	3210.53
3	80	4249.57
3	81	4433.69
3	82	2608.1
3	83	3919.12
3	84	3918.22
3	85	1944.78
3	86	3331.21
3	87	3034.52
3	88	3441.63
3	89	2164.34
3	90	3363.55
3	91	4194.42
3	92	5190.61
3	93	5449.73
3	94	3858.42
3	95	4506.16
3	96	5125.05
3	97	5563.01
3	98	3641.89
3	99	2924.53
3	100	3231.19
3	101	3737.01
3	102	5255.23
3	103	3819.35
8	1	6103.17
8	2	6418.09
8	3	3592.77
8	4	4986.61
8	5	7074.25
8	6	7704.97
8	7	6467.78
8	8	5008.77
8	9	5862.32
8	10	6170.47
8	11	4655.31
8	12	4239.19
8	13	4315.61
8	14	5254.23
8	15	3907.98
8	16	4188.36
8	17	3057.25
8	18	5818.26
8	19	5519.43
8	20	7816.38
8	21	6142.8
8	22	6338.42
8	23	6859.06
8	24	5813.17
8	25	4020.46
8	26	5271.03
8	27	4216.47
8	28	3968.31
8	29	4996.28
8	30	3924.21
8	31	6320.78
8	32	4522.23
8	33	4064.16
8	34	4508.66
8	35	5394.55
8	36	4486.32
8	37	5345.68
8	38	5650.43
8	39	5440.89
8	40	5121.47
8	41	6908.77
8	42	4992.64
8	43	5863.82
8	44	6804.61
8	45	6199.37
8	46	4206.32
8	47	4615.49
8	48	5833.88
8	49	6462.45
8	50	7587.2
8	51	6218.31
8	52	7279.48
8	53	5910.41
8	54	6129.67
8	55	7100.57
8	56	6650.72
8	57	6661.4
8	58	6263.51
8	59	8531.4
8	60	4931.56
8	61	5765.18
8	62	4936.21
8	63	5851.8
8	64	6171.57
8	65	7394.52
8	66	4905.02
8	67	5918.77
8	68	5804.9
8	69	5452.37
8	70	5514.7
8	71	6487.19
8	72	5856.64
8	73	6637.28
8	74	5356.46
8	75	4667.71
8	76	5508.98
8	77	4888.7
8	78	4983.87
8	79	5965.95
8	80	4621.02
8	81	5741.15
8	82	5792.76
8	83	4841.2
8	84	7015.45
8	85	7508.58
8	86	6673.05
8	87	6282.14
8	88	5206.94
8	89	4745.47
8	90	5167.42
8	91	5573.36
8	92	7572.32
8	93	4702.11
8	94	6626.51
8	95	4839.34
8	96	4539.36
8	97	5267.02
8	98	6520.27
8	99	6742.73
8	100	7179.82
8	101	5042.37
Summary statistics
Clone	Average fluorescence intensity	Standard deviation
3	3917.32	948.07
8	5663.23	1066.38
