# Supplementary material for: Endogenous tagging using split mNeonGreen in human iPSCs for live imaging studies
Source: eLife. 2024 Apr 23;12:RP92819. doi: 10.7554/eLife.92819 (PMC11037917; doi:10.7554/eLife.92819)
Supplement: Figure 3—source data 1. [file elife-92819-fig3-data1.xlsx]

## Sheet: B
Clone genotype counts
Locus	Tag/Tag	Tag/Mutated tag	Tag/WT	Tag/indel	Mutated tag/Mutated tag	Mutated tag/WT	Mutated tag/indel	WT/WT	WT/indel	indel/indel	Total
H2BC11	15	1	0	13	2	0	1	0	0	0	32
ACTB	0	0	1	9	3	0	14	0	1	4	32
TUBA1B	0	0	0	1	0	0	3	0	0	0	4
ANLN	5	2	3	12	0	1	5	2	0	2	32
RHOA	3	0	3	8	2	0	6	0	0	2	24
Clone genotype frequencies
Locus	Tag/Tag	Tag/Mutated tag	Tag/WT	Tag/indel	Mutated tag/Mutated tag	Mutated tag/WT	Mutated tag/indel	WT/WT	WT/indel	indel/indel	Total
H2BC11	0.46875	0.03125	0	0.40625	0.0625	0	0.03125	0	0	0	1
ACTB	0	0	0.03125	0.28125	0.09375	0	0.4375	0	0.03125	0.125	1
TUBA1B	0	0	0	0.25	0	0	0.75	0	0	0	1
ANLN	0.15625	0.0625	0.09375	0.375	0	0.03125	0.15625	0.0625	0	0.0625	1
RHOA	0.125	0	0.125	0.333333	0.0833333	0	0.25	0	0	0.0833333	1
