# Supplementary material for: Endogenous tagging using split mNeonGreen in human iPSCs for live imaging studies
Source: eLife. 2024 Apr 23;12:RP92819. doi: 10.7554/eLife.92819 (PMC11037917; doi:10.7554/eLife.92819)
Supplement: Figure 4—source data 1. [file elife-92819-fig4-data1.xlsx]

## Sheet: A
Raw SNR measurements
Locus	Imaging settings	Field of view	Noise	Signal	Background	SNR
H2BC11	Low-exposure	1	64.616	440.766	403.751	0.572846
H2BC11	Low-exposure	2	59.582	428.127	402.665	0.427344
H2BC11	Low-exposure	3	60.447	440.106	408.552	0.522011
H2BC11	Low-exposure	4	79.023	467.793	411.283	0.715108
H2BC11	Low-exposure	5	69.692	443.383	403.814	0.56777
H2BC11	Low-exposure	6	76.547	450.17	403.228	0.613244
H2BC11	Low-exposure	7	62.727	440.791	405.284	0.566056
H2BC11	Low-exposure	8	63.778	434.516	401.766	0.5135
H2BC11	Low-exposure	9	65.812	446.83	411.036	0.543883
H2BC11	Low-exposure	10	62.208	436.333	405.451	0.496431
H2BC11	High-exposure	1	1906.79	11288.6	2524.86	4.59605
H2BC11	High-exposure	2	1342.69	9875.82	2554.51	5.4527
H2BC11	High-exposure	3	1519.86	9769.17	2179.8	4.99345
H2BC11	High-exposure	4	2416.49	15839.4	3243.6	5.21245
H2BC11	High-exposure	5	2873.75	12951.1	2223.01	3.73315
H2BC11	High-exposure	6	2345.35	13760.7	2918.67	4.62277
H2BC11	High-exposure	7	2124.3	10910.5	2253.38	4.07527
H2BC11	High-exposure	8	1441.38	10607.5	2568.44	5.57733
H2BC11	High-exposure	9	1552.19	10722	2708.35	5.1628
H2BC11	High-exposure	10	1580.61	10953.5	2232.52	5.51744
ACTB	Low-exposure	1	394.552	1776.21	505.711	3.2201
ACTB	Low-exposure	2	414.381	1420.41	498.462	2.22488
ACTB	Low-exposure	3	327.048	1704.84	473.206	3.76592
ACTB	Low-exposure	4	311.058	1463.7	541.438	2.96492
ACTB	Low-exposure	5	348.109	1587.35	450.788	3.26496
ACTB	Low-exposure	6	373.317	2106.7	452.157	4.432
ACTB	Low-exposure	7	358.033	1821.62	492.184	3.71315
ACTB	Low-exposure	8	356.334	1780.85	572.088	3.39223
ACTB	Low-exposure	9	321.179	1693.46	463.065	3.83086
ACTB	Low-exposure	10	391.924	2134.39	545.107	4.05507
ACTB	High-exposure	1	1102.66	6022.3	804.436	4.73204
ACTB	High-exposure	2	880.545	5629	667.018	5.63513
ACTB	High-exposure	3	707.803	5754.6	692.488	7.15186
ACTB	High-exposure	4	719.853	4785.85	942.358	5.33927
ACTB	High-exposure	5	837.02	5298.26	614.287	5.59601
ACTB	High-exposure	6	797.076	7494.93	626.824	8.61662
ACTB	High-exposure	7	856.555	6312.22	735.057	6.51115
ACTB	High-exposure	8	838.06	6146.04	1086.41	6.0373
ACTB	High-exposure	9	703.611	5655.93	586.946	7.20425
ACTB	High-exposure	10	924.401	7558.08	929.738	7.17042
TUBA1B	Low-exposure	1	126.194	595.55	410.73	1.46457
TUBA1B	Low-exposure	2	88.085	484.404	411.277	0.830187
TUBA1B	Low-exposure	3	80.319	463.832	407.679	0.699125
TUBA1B	Low-exposure	4	95.073	511.308	418.006	0.981372
TUBA1B	Low-exposure	5	103.688	519.391	404.818	1.10498
TUBA1B	Low-exposure	6	87.908	492.199	411.949	0.912886
TUBA1B	Low-exposure	7	113.75	558.215	413.46	1.27257
TUBA1B	Low-exposure	8	93.583	499.607	414.601	0.908349
TUBA1B	Low-exposure	9	110.993	533.525	403.878	1.16806
TUBA1B	Low-exposure	10	96.503	504.887	401.845	1.06776
TUBA1B	High-exposure	1	1491.48	14167.4	1327.6	8.60879
TUBA1B	High-exposure	2	737.4	6312.39	985.757	7.22353
TUBA1B	High-exposure	3	672.176	5112.8	1010.77	6.1026
TUBA1B	High-exposure	4	928.391	7511.91	1177.53	6.82297
TUBA1B	High-exposure	5	994.045	8740.27	1095.01	7.69105
TUBA1B	High-exposure	6	833.85	6255.91	1055.61	6.23649
TUBA1B	High-exposure	7	1035.43	10599.8	1124.19	9.15135
TUBA1B	High-exposure	8	788.611	6924.61	1034.84	7.46854
TUBA1B	High-exposure	9	1097.3	9574.89	1117.86	7.70711
TUBA1B	High-exposure	10	833.535	7616.54	976.42	7.96622
ANLN	Low-exposure	1	85.925	474.43	419.161	0.643224
ANLN	Low-exposure	2	87.629	487.378	446.85	0.462495
ANLN	Low-exposure	3	99.301	503.472	422.943	0.810959
ANLN	Low-exposure	4	86.795	499.245	445.015	0.624806
ANLN	Low-exposure	5	93.027	498.947	432.159	0.717942
ANLN	Low-exposure	6	89.399	507.521	459.162	0.540934
ANLN	Low-exposure	7	103.874	531.034	470.763	0.580232
ANLN	Low-exposure	8	89.324	502.368	484.691	0.197898
ANLN	Low-exposure	9	108.891	534.968	468.571	0.609757
ANLN	Low-exposure	10	106.412	534.575	461.169	0.689828
ANLN	High-exposure	1	772.84	5828.35	2165.07	4.74002
ANLN	High-exposure	2	697.788	5649.45	3035.15	3.74656
ANLN	High-exposure	3	925.458	7859.92	2590.34	5.69403
ANLN	High-exposure	4	745.839	6313.57	2574.99	5.01259
ANLN	High-exposure	5	874.422	7083.98	2571.18	5.1609
ANLN	High-exposure	6	732.577	5954.49	2735.09	4.39462
ANLN	High-exposure	7	795.161	6226.68	2392.55	4.82183
ANLN	High-exposure	8	681.108	4928.9	2697.51	3.27611
ANLN	High-exposure	9	849.64	7072.03	2657.23	5.19609
ANLN	High-exposure	10	830.048	6250.58	3001.79	3.91397
RHOA	Low-exposure	1	120.364	574.189	508.216	0.548112
RHOA	Low-exposure	2	114.692	556.936	451.818	0.916524
RHOA	Low-exposure	3	92.076	497.303	465.108	0.349657
RHOA	Low-exposure	4	115.405	544.355	454.777	0.776206
RHOA	Low-exposure	5	111.636	548.521	443.316	0.942393
RHOA	Low-exposure	6	106.637	530.136	455.705	0.697985
RHOA	Low-exposure	7	124.444	571.522	460.802	0.889717
RHOA	High-exposure	1	856.808	7435.17	4168.29	3.81284
RHOA	High-exposure	2	817.316	7241.19	2438.29	5.87643
RHOA	High-exposure	3	612.979	4441.17	2911.8	2.49498
RHOA	High-exposure	4	879.343	6742.16	2758.64	4.5301
RHOA	High-exposure	5	803.975	6809.04	2165.18	5.77611
RHOA	High-exposure	6	719.458	5672.76	2523.46	4.37733
RHOA	High-exposure	7	796.439	7831.88	3064.23	5.9862
SNR summary statistics
Locus	Imaging settings	Average SNR	Standard deviation
H2BC11	Low-exposure	0.553819	0.0762142
H2BC11	High-exposure	4.89434	0.626414
ACTB	Low-exposure	3.48641	0.619854
ACTB	High-exposure	6.39941	1.15478
TUBA1B	Low-exposure	1.04099	0.224321
TUBA1B	High-exposure	7.49787	0.962522
ANLN	Low-exposure	0.587807	0.167348
ANLN	High-exposure	4.59567	0.752737
RHOA	Low-exposure	0.731513	0.218441
RHOA	High-exposure	4.69343	1.28958
