# Supplementary material for: Endogenous tagging using split mNeonGreen in human iPSCs for live imaging studies
Source: eLife. 2024 Apr 23;12:RP92819. doi: 10.7554/eLife.92819 (PMC11037917; doi:10.7554/eLife.92819)
Supplement: Figure 5—figure supplement 1—source data 1. [file elife-92819-fig5-figsupp1-data1.xlsx]

## Sheet: B
Normalized furrow breadth
Protein	Cell	Furrow breath (pixels)	Cortex length (pixels)	Furrow breadth (% of cortex length)
Anillin	1	33	318	10.3774
Anillin	2	31	394	7.86802
Anillin	3	18	321	5.60748
Anillin	4	26	455	5.71429
Anillin	5	25	303	8.25083
Anillin	6	24	386	6.21762
Anillin	7	25	288	8.68056
Anillin	8	23	395	5.82278
Anillin	9	30	314	9.55414
Anillin	10	22	273	8.05861
RhoA	1	28	398	7.03518
RhoA	2	34	317	10.7256
RhoA	3	30	349	8.59599
RhoA	4	48	274	17.5182
RhoA	5	62	276	22.4638
RhoA	6	39	279	13.9785
RhoA	7	34	376	9.04255
RhoA	8	34	419	8.11456
RhoA	9	63	346	18.2081
RhoA	10	40	294	13.6054
Summary statistics
Protein	Average normalized furrow breadth	Standard deviation
Anillin	7.61517	1.69964
RhoA	12.9288	5.14297
Unpaired t test with Welch's correction
P value	0.0101
P value summary	*
Significantly different (P < 0.05)?	Yes
One- or two-tailed P value?	Two-tailed
Welch-corrected t, df	t=3.102, df=10.94
