# Supplementary material for: Endogenous tagging using split mNeonGreen in human iPSCs for live imaging studies
Source: eLife. 2024 Apr 23;12:RP92819. doi: 10.7554/eLife.92819 (PMC11037917; doi:10.7554/eLife.92819)
Supplement: Figure 5—source data 1. [file elife-92819-fig5-data1.xlsx]

## Sheet: B
Cytokinesis duration
Cell	Anaphase onset timepoint	End of ingression timepoint	Cytokinesis duration (minutes)
1	5	28	23
2	35	53	18
3	8	30	22
4	52	74	22
5	9	26	17
6	5	23	18
7	1	16	15
8	4	20	16
9	4	21	17
10	3	19	16
11	5	20	15
12	8	23	15
13	3	25	22
14	29	45	16
15	10	28	18
16	19	46	27
17	6	31	25
18	15	36	21
19	3	16	13
20	9	25	16
21	8	23	15
22	11	30	19
23	9	24	15
24	11	25	14
25	19	42	23
26	12	32	20
27	13	39	26
28	11	29	18
29	5	24	19
30	26	54	28
31	15	42	27
32	6	19	13
33	12	28	16
34	15	31	16
35	28	43	15
36	28	44	16
37	11	29	18
38	13	31	18
39	34	52	18
Summary statistics
Average cytokinesis duration	Standard deviation
18.6154	4.04979

## Sheet: C
Raw fluorescence intensity values
Protein	Cell	Mean cortical value	Mean cytosolic value	Cortex:cytosol ratio
Anillin	1	125.847	181.848	0.692044
Anillin	2	146.169	195.56	0.747439
Anillin	3	146.501	160.816	0.910985
Anillin	4	154.136	201.859	0.76358
Anillin	5	192.163	255.602	0.751806
Anillin	6	187.387	194.886	0.961521
Anillin	7	209.631	225.63	0.929091
Anillin	8	209.992	256.778	0.817796
Anillin	9	173.408	257.56	0.67327
Anillin	10	151.38	245.227	0.617306
RhoA	1	368.844	303.633	1.21477
RhoA	2	495.149	386.306	1.28175
RhoA	3	384.125	286.19	1.3422
RhoA	4	350.191	368.423	0.950513
RhoA	5	392.216	393.348	0.997122
RhoA	6	420.844	388.654	1.08283
RhoA	7	428.589	424.551	1.00951
RhoA	8	473.408	360.845	1.31194
RhoA	9	324.332	265.475	1.2217
RhoA	10	316.077	280.767	1.12576
Actin	1	2077.1	1467.63	1.41527
Actin	2	1826.09	1173.69	1.55586
Actin	3	1396.82	1202.17	1.16191
Actin	4	1984.6	1114.32	1.78099
Actin	5	2132.68	899.077	2.37208
Actin	6	1850.44	960.981	1.92558
Actin	7	1908.27	886.238	2.15323
Actin	8	1530.44	895.183	1.70964
Actin	9	1843.3	1396.14	1.32028
Actin	10	1938.16	1217.75	1.59159
Summary statistics
Protein	Average cortex:cytosol ratio	Standard deviation
Anillin	0.786484	0.115981
RhoA	1.15381	0.140524
Actin	1.69864	0.374456
Brown-Forsythe ANOVA test
F* (DFn, DFd)	36.44 (2.000, 13.38)
P value	<0.0001
P value summary	****
Significant diff. among means (P < 0.05)?	Yes
Welch's ANOVA test
W (DFn, DFd)	38.41 (2.000, 16.37)
P value	<0.0001
P value summary	****
Significant diff. among means (P < 0.05)?	Yes
Dunnett's T3 multiple comparisons test
Comparison	Mean Diff.	95.00% CI of diff.	Below threshold?	Summary	Adjusted P Value
Anillin vs. RhoA	-0.3673	-0.5191 to -0.2156	Yes	****	<0.0001
Anillin vs. Actin	-0.9122	-1.257 to -0.5671	Yes	****	<0.0001
RhoA vs. Actin	-0.5448	-0.8969 to -0.1927	Yes	**	0.0036

## Sheet: D
Raw fluorescence intensity values
Protein	Time relative to anaphase onset	Furrow position	1	2	3	4	5	6	7	8	9	10	11	12	13	14	15	16	17	18	19	20	21	22	23	24	25	26	27	28	29	30	31	32	33	34	35	36	37	38	39	40	41	42	43	44	45	46	47
Anillin	-02:00	189	134.627	133.258	133.251	135.017	135.581	137.187	139.93	139.66	142.485	145.269	146.358	148.468	149.516	150.986	151.551	149.481	148.934	145.489	143.786	139.595	137.735	135.501	132.894	129.975	127.863	121.016	118.153	116.901	112.056	110.024	109.235	108.197	108.533	106.902	103.636	104.079	104.63	104.918	107.981	111.089	113.415	114.033	115.125	115.895	115.896	116.25	117.365
Anillin	00:00	123	184.174	180.207	178.503	176.992	170.909	168.273	162.498	155.234	147.825	139.994	134.831	127.555	125.828	125.782	128.158	129.923	132.977	135.66	137.903	141.021	141.897	141.103	140.592	140.44	137.92	136.257	137.46	137.979	136.85	136.423	137.231	137.946	138.792	138.935	139.814	140.871	141.496	142.78	142.321	141.626	142.921	143.605	142.191	140.436	139.928	139.584	139.091
Anillin	02:00	165	130.473	130.718	130.822	129.513	125.109	124.211	119.984	115.844	110.681	107.457	104.498	99.924	94.59	92.802	91.062	92.307	94.907	97.933	104.79	107.622	113.839	120.588	125.68	132.024	138.792	147.084	155.458	164.032	169.165	170.224	172.961	174.055	174.037	174.001	171.684	170.529	174.429	177.416	178.813	181.48	183.859	184.858	184.988	185.469	187.61	190.525	190.66
Anillin	04:00	168	68.029	60.189	50.661	43.156	38.424	32.053	25.135	22.414	20.449	21.088	19.761	19.483	23.055	26.851	25.471	28.609	29.562	28.216	27.917	39.481	46.056	50.747	58.796	69.327	78.214	91.591	102.609	126.279	138.786	151.4	162.998	177.439	183.405	185.183	189.355	194.282	200.992	207.442	215.756	225.949	236.489	238.349	238.251	236.694	236.435	235.804	231.899
Anillin	06:00	165	106.219	105.069	104.338	102.784	101.883	99.996	98.4	96.532	96.141	95.182	93.71	92.342	90.292	88.188	86.108	85.136	83.524	79.663	78.255	79.63	81.449	81.862	83.411	84.223	84.031	85.049	88.553	91.525	91.917	93.334	97.343	102.021	106.369	111.443	120.261	127.304	126.654	127.551	128.158	128.975	128.741	128.289	129.791	136.043	141.607	143.209	146.431
Anillin	08:00	196	92.608	93.631	94.593	93.865	92.607	91.754	90.979	91.612	91.595	92.343	94.716	97.533	99.684	102.36	103.995	105.033	101.78	99.948	101.818	101.665	99.851	99.913	98.849	96.578	96.787	96.794	94.439	93.417	92.34	92.501	89.439	85.539	83.654	81.261	76.878	75.294	72.526	68.762	64.478	59.964	57.614	55.672	54.412	51.024	50.205	51.682	51.38
Anillin	10:00	306	118.538	124.657	130.047	127.827	130.95	132.059	133.067	135.381	135.702	135.954	136.192	137.686	137.749	138.689	138.02	137.636	135.78	131.195	129.26	126.543	124.909	123.808	123.594	121.756	121.382	120.542	120.649	120.74	122.752	121.113	121.147	120.356	122.014	122.938	123.703	129.167	134.367	137.581	140.823	145.993	146.967	148.785	150.405	151.095	152.874	152.785	153.604
Anillin	12:00	307	134.871	125.248	117.457	111.686	110.735	102.589	98.83	95.127	92.303	92.221	91.645	90.671	92.37	92.159	91.528	90.055	88.782	88.193	88.21	87.041	87.463	87.727	90.044	92.099	94.148	95.443	97.077	97.409	97.97	98.827	98.322	97.429	95.599	94.605	94.917	92.929	90.496	88.943	87.206	84.822	81.515	79.864	77.801	78.488	80.304	81.278	81.974
RhoA	-02:00	159	402.2	402.745	404.751	409.194	411.446	409.66	412.658	416.453	424.8	431.475	438.54	444.049	445.776	446.07	450.312	452.762	450.591	448.747	448.294	448.138	446.511	446.664	447.091	443.637	436.125	433.197	427.443	421.279	415.551	411.951	411.747	413.819	419.292	426.735	430.856	433.121	434.055	432.331	430.887	426.115	424.608	421.016	414.402	405.271	399.699	398.622	396.846
RhoA	00:00	167	416.846	427.417	432.08	441.408	447.437	448.115	446.87	446.567	443.355	440.372	437.251	434.994	432.426	431.168	434.089	435.393	435.834	434.904	433.064	433.674	430.246	429.522	422.08	415.069	408.505	402.807	393.717	388.817	385.587	386.35	385.228	391.574	389.904	387.938	387.579	390.216	389.838	386.957	384.219	388.968	394.633	400.558	406.772	417.607	428.038	431.766	439.141
RhoA	02:00	167	389.788	387.944	387.357	385.082	384.857	385.3	391.457	398.043	403.412	405.047	404.089	403.144	399.423	393.649	387.052	383.145	382.777	385.393	390.278	394.905	396.131	397.189	395.27	395.919	395.658	398.958	400.826	401.101	395.817	388.065	378.027	364.749	353.517	343.141	335.415	330.633	325.456	324.227	327.806	332.037	340.115	349.088	357.081	362.988	366.121	368.307	373.338
RhoA	04:00	180	404.825	411.094	419.77	436.367	445.057	450.724	452.39	451.003	450.272	451.126	447.416	448.108	446.74	446.131	449.879	450.566	452.063	456.254	462.25	468.243	475.51	482.496	497.59	510.538	517.043	520.931	525.382	521.67	516.708	511.2	503.434	497.613	489.578	470.425	449.508	429.205	414.906	406.735	400.737	394.598	391.298	393.233	396.367	399.79	403.088	406.709	410.959
RhoA	06:00	203	383.583	391.928	406.015	413.454	418.698	427.023	428.94	429.154	427.2	430.142	440.278	439.734	446.61	445.261	439.606	437.794	435.051	435.669	439.667	439.16	440.702	441.326	438.123	432.128	431.007	432.033	433.956	439.204	451.831	460.536	467.735	474.704	477.071	481.876	483.473	487.346	489.67	494.219	498.389	500.348	498.199	494.127	488.881	484.105	478.909	472.762	468.787
RhoA	08:00	213	371.13	369.835	368.933	368.996	365.706	364.126	363.581	358.748	359.958	363.182	369.951	375.921	381.054	383.796	390.478	395.697	403.07	402.859	403.036	404.685	407.843	403.026	394.603	397.024	400.809	403.318	405.32	410.301	420.198	427.909	437.046	443.949	446.968	453.098	460.775	468.629	475.775	480.908	481.608	479.15	476.12	471.569	468.276	470.708	468.084	466.179	467.005
RhoA	10:00	195	426.362	435.611	444.041	449.912	456.082	462.921	469.436	475.307	473.299	469.508	463.56	453.655	445.621	438.935	431.715	427.879	429.375	432.639	434.716	439.549	446.716	454.121	464.626	473.549	486.277	494.967	498.512	499.987	501.792	499.764	496.66	492.264	487.516	481.079	472.763	464.491	458.439	451.391	445.914	441.61	440.428	440.066	437.314	433.03	432.505	436.366	437.242
RhoA	12:00	194	322.286	318.165	318.749	319.921	320.491	319.054	317.185	312.372	313.326	314.112	316.868	320.96	323.525	328.82	333.58	337.354	343.611	351.167	357.787	365.129	368.421	368.976	369.81	369.19	367.629	366.216	364.257	363.288	363.452	363.749	361.798	358.165	353.283	346.03	339.412	333.846	331.247	330.332	331.428	331.427	332.45	335.341	338.542	339.86	341.413	340.677	337.15
[truncated: 553 more columns]

## Sheet: E
Raw fluorescence intensity values (pixel positions along the linescan)
Protein	Cell	Furrow position	1	2	3	4	5	6	7	8	9	10	11	12	13	14	15	16	17	18	19	20	21	22	23	24	25	26	27	28	29	30	31	32	33	34	35	36	37	38	39	40	41	42	43	44	45	46	47
Anillin	1	165	106.219	105.069	104.338	102.784	101.883	99.996	98.4	96.532	96.141	95.182	93.71	92.342	90.292	88.188	86.108	85.136	83.524	79.663	78.255	79.63	81.449	81.862	83.411	84.223	84.031	85.049	88.553	91.525	91.917	93.334	97.343	102.021	106.369	111.443	120.261	127.304	126.654	127.551	128.158	128.975	128.741	128.289	129.791	136.043	141.607	143.209	146.431
Anillin	2	186	164.751	162.174	162.454	164.911	166.311	167.179	168.145	170.639	174.226	187.235	188.534	200.191	198.729	201.35	200.9	202.742	202.655	201.707	204.772	203.283	200.932	199.944	198.482	198.276	202.484	200.692	199.149	197.166	194.854	198.397	199.452	193.836	186.407	179.174	174.862	177.625	174.562	169.268	177.076	171.963	168.265	166.286	164.912	165.798	162.799	159.056	155.456
Anillin	3	155	153.684	151.367	147.846	145.376	142.117	138.423	135.255	132.388	131.178	131.503	132.446	134.177	137.236	139.151	141.761	143.108	143.849	143.516	142.257	141.239	141.334	143.133	145.94	146.908	146.923	148.569	152.05	155.749	158.788	161.28	161.223	161.498	164.905	166.41	169.601	169.415	168.199	169.643	171.27	168.853	168.772	169.777	167.895	156.485	158.377	161.237	162.181
Anillin	4	168	99.342	90.363	83.089	79.163	73.212	71.403	69.015	68.464	66.883	67.15	65.572	67.223	70.08	71.393	72.256	75.511	77.672	79.57	81.177	82.269	83.56	82.333	81.226	79.89	79.823	85.445	88.822	93.103	95.835	99.747	101.209	102.041	103.792	106.396	108.186	109.982	111.172	114.362	115.15	113.822	115.291	116.856	113.348	112.737	109.618	108.382	106.419
Anillin	5	142	144.934	146.977	150.726	153.022	153.844	154.306	154.011	153.453	151.665	153.317	156.446	156.195	155.022	154.967	155.473	152.946	151.622	152.715	152.922	152.673	154.255	152.423	146.917	144.518	144.621	142.839	142.33	142.003	141.386	141.649	142.38	142.493	143.569	143.788	144.443	143.38	141.605	142.688	143.697	143.796	144.954	147.902	151.231	156.455	161.69	165.967	170.065
Anillin	6	199	130.171	130.017	130.984	129.512	130.093	130.82	130.483	130.425	138.608	139.598	143.688	146.147	147.547	147.56	148.263	148.986	153.403	156.641	160.042	163.333	165.659	172.553	172.984	176.977	181.012	182.492	183.54	185.639	189.718	190.286	192.995	194.988	192.925	190.731	185.547	182.617	179.365	177.4	178.225	175.186	174.494	173.12	172.285	171.543	173.949	171.97	168.473
Anillin	7	121	126.247	125.013	127.213	128.894	130.265	131.432	135.669	139.998	142.499	144.31	145.936	149.1	151.458	151.65	153.791	154.769	154.656	156.037	158.048	162.453	167.662	167.7	164.382	160.447	156.917	152.277	147.674	143.702	140.311	137.764	135.223	133.829	133.677	130.201	128.417	126.207	125.025	125.598	127.305	129.941	128.58	128.683	128.858	126.502	124.203	123.609	124.601
Anillin	8	189	123.803	122.921	130.424	129.611	128.56	128.596	133.864	137.183	138.997	143.949	147.544	143.813	145.337	148.443	150.265	150.953	150.209	149.714	154.101	158.273	160.975	167.153	162.108	164.714	165.16	164.533	162.014	159.508	159.368	156.232	162.82	162.62	164.34	168.069	168.242	171.993	166.281	175.625	174.434	177.276	178.59	181.16	186.219	190.733	191.158	193.294	192.326
Anillin	9	161	188.957	180.882	169.847	170.005	168.136	164.832	163.399	160.96	159.215	158.405	151.487	149.305	147.705	147.461	144.429	143.263	145.936	148.767	151.178	152.585	154.716	155.711	155.366	156.119	155.89	155.375	156.234	156.608	157.716	159.918	159.419	165.012	167.789	172.103	175.598	176.893	182.518	183.97	186.156	188.047	189.554	191.346	192.341	193.043	188.451	185.213	183.723
Anillin	10	171	159.169	172.016	181.633	187.284	196.329	203.366	205.77	204.759	202.989	199.849	196.416	191.091	183.928	173.283	164.679	155.966	149.522	144.665	140.623	137.744	133.342	128.575	119.52	111.082	103.787	99.141	94.156	88.353	87.599	84.891	82.545	82.241	84.787	88.482	93.791	95.589	97.42	100.2	105.44	112.215	116.231	115.741	113.684	111.101	107.012	104.617	101.499
RhoA	1	213	371.13	369.835	368.933	368.996	365.706	364.126	363.581	358.748	359.958	363.182	369.951	375.921	381.054	383.796	390.478	395.697	403.07	402.859	403.036	404.685	407.843	403.026	394.603	397.024	400.809	403.318	405.32	410.301	420.198	427.909	437.046	443.949	446.968	453.098	460.775	468.629	475.775	480.908	481.608	479.15	476.12	471.569	468.276	470.708	468.084	466.179	467.005
RhoA	2	166	416.037	406.851	399.744	393.127	389.752	390.79	394.983	399.685	406.07	410.765	414.931	420.066	421.525	423.729	427.13	428.384	428.669	427.294	424.918	419.374	409.82	401.539	392.925	384.824	381.595	380.521	379.909	378.128	375.106	373.339	372.201	370.943	369.268	368.605	368.657	367.007	368.241	373.332	373.373	378.747	382.446	384.903	391.435	397.039	404.695	409.996	416.395
RhoA	3	177	314.182	313.134	311.682	310.842	308.214	304.536	301.417	300.496	299.166	299.369	297.329	296.945	295.867	294.806	297.459	299.461	300.242	299.642	300.417	300.797	299.768	300.175	304.015	309.652	315.941	316.349	319.917	326.463	333.394	340.989	344.227	346.388	349.769	348.738	346.935	344.933	341.684	335.233	332.197	329.1	324.242	326.454	325.129	327.11	331.405	338.904	343.116
RhoA	4	130	434.717	438.509	439.03	438.533	439.341	439.647	442.211	443.98	445.906	449.197	449.505	449.512	449.397	445.097	443.267	438.293	437.908	434.908	435.552	435.205	435.093	434.921	432.065	428.948	427.971	427.291	427.592	427.424	431.031	430.119	429.183	428.765	427.759	422.034	416.186	411.967	408.43	404.089	403.821	403.344	405.584	408.753	416.665	425.178	429.949	435.097	431.313
RhoA	5	113	214.488	217.363	221.28	225.621	230.18	235.239	242.995	249.601	252.011	253.233	252.027	249.141	247.513	246.067	244.714	241.636	237.734	237.958	244.259	248.965	254.744	265.726	274.755	279.429	285.086	290.127	291.957	290.229	289.848	292.053	290.453	288.527	288.726	287.137	287.997	288.271	288.643	287.73	290.574	292.539	293.793	294.024	291.341	287.929	284.058	281.184	282.404
RhoA	6	126	369.595	372.23	371.225	372.049	372.916	373.541	377.932	380.449	380.651	382.846	384.667	386.366	387.65	385.36	382.663	382.282	384.6	382.147	384.308	380.778	378.871	374.379	369.866	365.293	358.724	354.856	349.693	345.596	342.167	338.485	337.683	335.481	334.04	330.435	327.548	325.566	320.664	316.648	314.082	312.595	312.846	314.148	317.102	319.28	320.813	321.819	324.93
RhoA	7	192	311.489	318.053	328.629	340.274	347.343	353.716	362.429	368.663	372.91	372.787	372.109	372.701	369.389	364.678	360.409	358.6	358.449	355.937	361.202	360.506	357.577	352.558	350.612	346.522	337.423	331.102	326.244	321.97	317.653	317.575	315.403	312.827	316.09	316.401	316.283	316.994	319.041	318.712	318.001	319.208	322.891	323.478	327.517	326.849	326.11	324.759	327.415
RhoA	8	187	480.611	486.012	488.663	487.361	488.394	492.057	497.513	498.247	500.76	501.347	497.499	486.345	482.405	480.736	476.915	473.077	469.095	469.209	474.12	480.218	479.949	486.599	499.003	501.839	504.055	503.341	500.245	495.521	492.839	489.833	485.04	485.026	478.917	471.756	468.434	468.54	467.359	471.342	481.26	481.283	498.852	520.869	541.907	562.287	582.722	592.667	599.572
RhoA	9	178	375.61	372.707	372.864	371.561	371.772	371.101	369.05	364.852	358.619	354.655	348.869	344.199	340.455	334.93	328.425	324.145	320.562	314.683	310.681	311.765	315.127	319.358	326.16	333.163	336.372	335.906	339.673	343.405	346.125	348.001	351.42	351.76	350.852	352.373	356.264	358.536	360.154	361.592	362.938	368.3	371.606	378.184	382.972	388.016	392.861	398.391	405.587
RhoA	10	164	424.658	427.349	427.84	427.126	429.171	429.439	433.455	436.648	439.757	442.418	447.011	452.027	457.674	462.254	463.48	463.798	460.858	458.126	452.627	446.146	439.519	434.579	433.324	430.946	429.327	429.209	428.338	426.849	425.479	420.156	414.403	405.572	398.038	385.138	372.208	363.885	351.466	344.077	338.16	333.612	336.019	336.352	336.276	341.307	347.372	351.463	357.67
Aligned linescans (position relative to the furrow in microns)
Protein	Cell	-33.92	-33.76	-33.6	-33.44	-33.28	-33.12	-32.96	-32.8	-32.64	-32.48	-32.32	-32.16	-32	-31.84	-31.68	-31.52	-31.36	-31.2	-31.04	-30.88	-30.72	-30.56	-30.4	-30.24	-30.08	-29.92	-29.76	-29.6	-29.44	-29.28	-29.12	-28.96	-28.8	-28.64	-28.48	-28.32	-28.16	-28	-27.84	-27.68	-27.52	-27.36	-27.2	-27.04	-26.88	-26.72	-26.56	-26.4
Anillin	1
Anillin	2																												164.751	162.174	162.454	164.911	166.311	167.179	168.145	170.639	174.226	187.235	188.534	200.191	198.729	201.35	200.9	202.742	202.655	201.707	204.772	203.283	200.932
Anillin	3
Anillin	4																																														99.342	90.363	83.089
Anillin	5
Anillin	6															130.171	130.017	130.984	129.512	130.093	130.82	130.483	130.425	138.608	139.598	143.688	146.147	147.547	147.56	148.263	148.986	153.403	156.641	160.042	163.333	165.659	172.553	172.984	176.977	181.012	182.492	183.54	185.639	189.718	190.286	192.995	194.988	192.925	190.731
Anillin	7
Anillin	8																									123.803	122.921	130.424	129.611	128.56	128.596	133.864	137.183	138.997	143.949	147.544	143.813	145.337	148.443	150.265	150.953	150.209	149.714	154.101	158.273	160.975	167.153	162.108	164.714
Anillin	9
Anillin	10																																											159.169	172.016	181.633	187.284	196.329	203.366
RhoA	1	371.13	369.835	368.933	368.996	365.706	364.126	363.581	358.748	359.958	363.182	369.951	375.921	381.054	383.796	390.478	395.697	403.07	402.859	403.036	404.685	407.843	403.026	394.603	397.024	400.809	403.318	405.32	410.301	420.198	427.909	437.046	443.949	446.968	453.098	460.775	468.629	475.775	480.908	481.608	479.15	476.12	471.569	468.276	470.708	468.084	466.179	467.005	466.319
RhoA	2																																																416.037
RhoA	3																																					314.182	313.134	311.682	310.842	308.214	304.536	301.417	300.496	299.166	299.369	297.329	296.945
RhoA	4
RhoA	5
RhoA	6
RhoA	7																						311.489	318.053	328.629	340.274	347.343	353.716	362.429	368.663	372.91	372.787	372.109	372.701	369.389	364.678	360.409	358.6	358.449	355.937	361.202	360.506	357.577	352.558	350.612	346.522	337.423	331.102	326.244
RhoA	8																											480.611	486.012	488.663	487.361	488.394	492.057	497.513	498.247	500.76	501.347	497.499	486.345	482.405	480.736	476.915	473.077	469.095	469.209	474.12	480.218	479.949	486.599
RhoA	9																																				375.61	372.707	372.864	371.561	371.772	371.101	369.05	364.852	358.619	354.655	348.869	344.199	340.455
RhoA	10
Summary statistics (position relative to the furrow in microns)
Protein	Statistics	-30.56	-30.4	-30.24	-30.08	-29.92	-29.76	-29.6	-29.44	-29.28	-29.12	-28.96	-28.8	-28.64	-28.48	-28.32	-28.16	-28	-27.84	-27.68	-27.52	-27.36	-27.2	-27.04	-26.88	-26.72	-26.56	-26.4	-26.24	-26.08	-25.92	-25.76	-25.6	-25.44	-25.28	-25.12	-24.96	-24.8	-24.64	-24.48	-24.32	-24.16	-24	-23.84	-23.68	-23.52	-23.36	-23.2	-23.04
Anillin	Average					134.534	138.986	147.307	146.332	146.679	150.726	153.378	155.406	158.476	161.281	163.531	168.519	171.318	177.156	177.391	178.366	178.751	182.187	180.808	184.328	188.549	169.002	168.566	156.967	154.779	153.064	151.84	150.841	152.774	150.544	147.998	147.314	146.446	145.967	143.995	140.927	140.464	138.37	136.648	133.83	132.819	130.388	129.177	128.804
Anillin	Standard deviation					16.4233	12.1078	17.5714	16.89	17.0465	15.6957	14.8356	14.6518	12.8085	12.1541	17.0965	21.3029	20.6359	25.1854	24.293	25.9601	26.279	25.1798	19.598	17.6047	15.9586	46.7062	50.1773	52.4243	53.6699	53.5747	54.4945	53.9771	50.143	48.4055	47.6215	47.066	46.1799	41.8138	40.5716	37.9662	37.9705	37.4418	36.9068	36.4017	38.795	39.623	40.1551	40.6053
RhoA	Average	357.257	356.328	362.827	370.542	375.331	413.216	419.581	425.841	429.393	432.742	436.038	439.061	440.245	442.071	426.499	403.753	402.34	400.639	400.74	398.571	395.162	391.24	389.929	388.509	386.412	383.917	388.767	387.47	390.785	390.667	389.386	387.496	387.708	389.092	390.634	391.904	394.188	396.406	396.737	397.21	399.442	401.254	403.627	405.422	404.863	404.943	405.408	405.013
RhoA	Standard deviation	64.7264	54.129	48.3626	42.8047	39.5803	63.8149	62.3119	60.1987	57.2399	57.9235	60.364	62.7806	65.3835	69.9425	69.1249	79.0587	77.4318	77.4577	75.8807	75.0326	74.5257	74.5935	76.3789	78.3463	81.4681	83.6513	78.7445	83.0124	79.6129	80.7372	80.7817	80.6594	80.2489	80.2987	79.5573	78.8032	77.7574	75.9842	73.0169	70.5388	70.0182	69.2496	67.3687	67.0745	63.792	65.6506	69.1884	73.9734
[truncated: 453 more columns]

## Sheet: F
Measured peak breadth
Protein	Linescan	Peak breadth (microns)
Anillin	1	5.28
Anillin	2	4.96
Anillin	3	2.88
Anillin	4	4.16
Anillin	5	4
Anillin	6	3.84
Anillin	7	4
Anillin	8	3.68
Anillin	9	4.8
Anillin	10	3.52
RhoA	1	4.48
RhoA	2	5.44
RhoA	3	4.8
RhoA	4	7.68
RhoA	5	9.92
RhoA	6	6.24
RhoA	7	5.44
RhoA	8	5.44
RhoA	9	10.08
RhoA	10	6.4
Summary statistics
Protein	Average peak breadth	Standard deviation
Anillin	4.112	0.723645
RhoA	6.592	2.00664
Unpaired t test with Welch's correction
P value	0.0035
P value summary	**
Significantly different (P < 0.05)?	Yes
One- or two-tailed P value?	Two-tailed
Welch-corrected t, df	t=3.676, df=11.30

## Sheet: H
Raw fluorescence intensity values
Pixel position	1	2	3	4	5	6	7	8	9	10	11	12	13	14	15	16	17	18	19	20	21	22	23	24	25	26	27	28	29	30	31	32	33	34	35	36	37	38	39	40	41	42	43	44	45	46	47	48	49
Distance from the center (microns)	-15.04	-14.88	-14.72	-14.56	-14.4	-14.24	-14.08	-13.92	-13.76	-13.6	-13.44	-13.28	-13.12	-12.96	-12.8	-12.64	-12.48	-12.32	-12.16	-12	-11.84	-11.68	-11.52	-11.36	-11.2	-11.04	-10.88	-10.72	-10.56	-10.4	-10.24	-10.08	-9.92	-9.76	-9.6	-9.44	-9.28	-9.12	-8.96	-8.8	-8.64	-8.48	-8.32	-8.16	-8	-7.84	-7.68	-7.52	-7.36
Fluorescence intensity	3636.11	4042.74	3998.03	4497.78	4447.47	4309.43	4340.44	4657.92	5025.04	5447.09	5432.62	5237.9	5386.64	5678.3	6304.74	6389.8	7098.58	7483.75	7168.08	6872.59	7374.01	6732.24	7524.85	7170.21	7003.46	7298.91	7383.28	6981.37	6903.16	6224.04	6230.52	6519.44	6786.41	6605.46	6604.38	6206.6	6493.85	6989.94	6609.86	6518.17	6288.48	5937.01	6176.49	6404.36	6870.14	6772.31	6736.32	6905.64	6903.64
[truncated: 140 more columns]
