# Supplementary material for: Endogenous tagging using split mNeonGreen in human iPSCs for live imaging studies
Source: eLife. 2024 Apr 23;12:RP92819. doi: 10.7554/eLife.92819 (PMC11037917; doi:10.7554/eLife.92819)
Supplement: Supplementary file 1. — The results from the validation and quality control steps carried out on the smNG2-P cell line are listed. [file elife-92819-supp1.xlsx]

## Sheet: Sheet2
Characterization	Test	Result	Data
Genotype of the desired edit	PCR	Positive	Fig. S1E-H
	Sequencing		Fig. 1C
Allelic status	PCR	Heterozygous	Fig. S1E-H
	Sequencing		Fig. 1C
	Digital PCR		Fig. S2A-E
Karyotype	G-banding karyotype	Normal (46, XX)	Fig. 1D
Pluripotency status	Flow cytometry (TRA1-60, OCT3/4, NANOG)	Positive	Fig. 1E
Differentiation potential	Directed differentiation and flow cytometry (ectoderm: PAX6, mesoderm: NCAM, endoderm: FOXA2)	Positive	Fig. 1F
Absence of random integrations	Digital PCR	Negative	Fig. S2A-E
Off-target mutation analysis	Sequencing of the top 12 predicted off-target sites	Negative	Fig. S2F and Tab. S2
Colony morphology	Microscopy	Normal	Fig. S2G
Contamination status	Mycoplasma PCR test	Negative	Fig. S2H
