# Supplementary material for: Endogenous tagging using split mNeonGreen in human iPSCs for live imaging studies
Source: eLife. 2024 Apr 23;12:RP92819. doi: 10.7554/eLife.92819 (PMC11037917; doi:10.7554/eLife.92819)
Supplement: Supplementary file 2. — The top off-target sites for the AAVS1 sgRNA are listed, along with the results of sequencing these sites in the split mNeonGreen2 parental (smNG2-P) cell line compared to wild-type (WT) cells. [file elife-92819-supp2.xlsx]

## Sheet: Sheet2
Name	Sequence	PAM	Mismatches	Sequence in smNG2-P cell line	Chromosome	Strand	Position	Location	Source
OT1	GGAGACATTAGGGACAGGAT	AAG	GG*G*CA*TAGGGACA*GAT/T*G	WT	10	+	119439186	Intron (GRK5)	Benchling
OT2	GAGGGCTCTAGGGACAGGAT	GAG	G*GG*C*CTAGGGACAGGAT/T*G	WT	9	-	90086414	Intergenic	Benchling
OT3	GGCCCCACTAGGGACAGGAC	GAG	GG**CCACTAGGGACAGGA*/TGG	WT	7	+	122844142	Intron (CADPS2)	Benchling
OT4	GGGACCATCAGGGACAGGAT	GGG	GGG*CCA**AGGGACAGGAT/TGG	WT	6	+	36797704	Intron (CPNE5)	Benchling, CRISPOR
OT5	CAGGGCACTGGGGACAGGAT	CAG	**GG*CACT*GGGACAGGAT/T*G	WT	14	+	92970608	Intron ( ITPK1)	Benchling
OT6	GGGGCTATATGGGACAGGAT	GGG	GGGGC*A***GGGACAGGAT/TGG	WT	1	+	21602005	Intron (RAP1GAP)	CRISPOR
OT7	TGGGCCATTAGGGACAAGAA	GGG	*GGGCCA*TAGGGACA*GA*/TGG	WT	15	+	63926606	Intron (DAPK2)	CRISPOR
OT8	GGGGCCAATTAGGACAGGAT	GGG	GGGGCCA*T**GGACAGGAT/TGG	WT	13	+	105960580	Intron (ENSG00000287923)	CRISPOR
OT9	GGGGCAACTAGAGACAGGAA	GGG	GGGGC*ACTAG*GACAGGA*/TGG	WT	8	-	22778074	Intron (PEBP4)	CRISPOR, Wang 2013
OT10	GGGGCTTCTAAGGACAGGAT	GGG	GGGGC**CTA*GGACAGGAT/TGG	WT	19	-	16064183	Intergenic	Wang 2013
OT11	GGGGCCCCTGGGGACAGAAT	GGG	GGGGCC*CT*GGGACAG*AT/TGG	WT	21	-	41521021	Intron (TMPRSS2)	Wang 2013
OT12	GGGGCCAGTGGGGACAGGAA	GGG	GGGGCCA*T*GGGACAGGA*/TGG	WT	2	-	231959836	Intergenic	Wang 2013
