# Supplementary material for: Endogenous tagging using split mNeonGreen in human iPSCs for live imaging studies
Source: eLife. 2024 Apr 23;12:RP92819. doi: 10.7554/eLife.92819 (PMC11037917; doi:10.7554/eLife.92819)
Supplement: Supplementary file 3. — The sequences of all sgRNAs used in this study are listed. [file elife-92819-supp3.xlsx]

## Sheet: Sheet2
Target gene/locus	Spacer sequence	Location	Spacer orientation	Distance to edit	Format	Chemical modifications	Source	Reference
AAVS1	GGGGCCACTAGGGACAGGAT	-	Forward	+11	crRNA+tracrRNA	No	Sigma	Oceguera-Yanez et al., 2016
H2BC11	ACTCACTGTTTACTTAGCGC	C-terminus	Reverse	-5	sgRNA	Yes	Synthego	Allencell.org
ACTB	GCCGTTGTCGACGACGAGCG	N-terminus	Reverse	+19	sgRNA	Yes	Synthego	Roberts et al., 2017
TUBA1B	GATGCACTCACGCTGCGGGA	N-terminus	Reverse	-5	sgRNA	Yes	Synthego	Roberts et al., 2017
ANLN	GTCTCGTAGTCCGACGCCTG	N-terminus	Forward	-8	sgRNA	Yes	Synthego	Husser et al., 2022
RHOA	AATCACCAGTTTCTTCCGGA	N-terminus	Reverse	+10	sgRNA	Yes	Synthego	Husser et al., 2022
RACGAP1	AGTCAATGCTGGGAAGTAAC	C-terminus	Reverse	+20	sgRNA	Yes	Synthego	This study
KRT18	TGCTGTCCGGGGAGAGAGAA	N-terminus	Reverse	-16	sgRNA	Yes	Synthego	Cho et al., 2022
KRT5	CACACTTGACTGGCGAGACA	N-terminus	Reverse	+1	sgRNA	Yes	Synthego	This study
KRT14	TGCAGGTGGTCATGGTGCAG	N-terminus	Reverse	-4	sgRNA	Yes	Synthego	This study
CDH1	GAGGCGGCGAGGACGACTAG	C-terminus	Forward	0	sgRNA	Yes	Synthego	Artegiani et al., 2020
SOX2	TGCCCCTCTCACACATGTGA	C-terminus	Forward	0	sgRNA	Yes	Synthego	Allencell.org
PAX6	GCACTTACTGTTCTGCATGC	N-terminus	Reverse	+1	sgRNA	Yes	Synthego	This study
NES	CTTTTCCTAGTCCTCCCCTG	C-terminus	Reverse	-8	sgRNA	Yes	Synthego	This study
TUBB3	CGCCAGACGCGCCCAGTATG	N-terminus	Forward	0	sgRNA	Yes	Synthego	This study
TBXT	GCCTTGCTGCTTCACATGGA	C-terminus	Reverse	-3	sgRNA	Yes	Synthego	This study
NCAM1	AGAACGAGAGCAAAGCATGA	C-terminus	Forward	0	sgRNA	Yes	Synthego	This study
FOXA2	AACTCCTCTTAAGAAGACGA	C-terminus	Forward	+8	sgRNA	Yes	Synthego	This study
