# Supplementary material for: Endogenous tagging using split mNeonGreen in human iPSCs for live imaging studies
Source: eLife. 2024 Apr 23;12:RP92819. doi: 10.7554/eLife.92819 (PMC11037917; doi:10.7554/eLife.92819)
Supplement: Supplementary file 4. — The sequences of the single-stranded oligonucleotides used as repair templates to integrate mNG211 at various loci are shown. For each oligonucleotide, the homology arms are shown in blue, the mNG211 tag in green, the protein linker in purple and mutations designed to remove homology and prevent Cas9 re-cutting in red. [file elife-92819-supp4.xlsx]

## Sheet: Sheet2
Target gene/locus	Strand	Sequence	Source
H2BC11	+	GGGAGTTGGCCAAGCACGCCGTGTCCGAGGGTACTAAGGCCGTCACCAAGTACACCAGCGCAAAAGGAGGTGGCACCGAGCTCAACTTCAAGGAGTGGCAAAAGGCCTTTACCGATATGATGTAAACAGTGAGTTGGTTGCAAACTCTCAACCCTAACGGCTCTTTTAAGAGCCACCCATGT	BioCorp
ACTB	+	GGCCAGGGCGGGGGCGACCTCGGCTCACAGCGCGCCCGGCTATTCTCGCAGCTCACCATGACCGAGCTCAACTTCAAGGAGTGGCAAAAGGCCTTTACCGATATGATGGGAGGTGGCATGGACGACGACATTGCTGCACTCGTCGTCGACAACGGCTCCGGCATGTGCAAGGCCGGCTTCGCGGGCGACGATGCCCCCC	BioCorp
TUBA1B	+	ATCTTTTTTCCTTCCCGCAGACCGAGCTCAACTTCAAGGAGTGGCAAAAGGCCTTTACCGATATGATGGGAGGTGGCATGCGTGAGTGCATCTCCATCCA	ThermoFisher Scientific
ANLN	-	GAGCGGTGGGTCATGGCTGGCTGCACCCGCAAACTCACTCACCTCCGTAAACGGATCCATGCCACCTCCCATCATATCGGTAAAGGCCTTTTGCCACTCCTTGAAGTTGAGCTCGGTCATCGCCCCTGCCGTCGGACTACGAGACGATGGAAACGGTGGTTCAAATTCAGGAAGAGAAAAGTGAGTCTC	BioCorp
RHOA	+	AAGCTACCTATGACTTCTTGTGCATTGCAGGTAATATCTGTGTTTTGTGTTTCAGCAATGACCGAGCTCAACTTCAAGGAGTGGCAAAAGGCCTTTACCGATATGATGGGAGGTGGCATGGCAGCTATTCGGAAGAAACTGGTGATTGTTGGTGATGGAGCCTGTGGAAAGACATGCTTGCTCATAGTCT	BioCorp
RACGAP1	+	AGCAAGTCTGCCACTAACCTAGGACGACAAGGCAACTTTTTTGCTTCTCCAATGCTCAAGGGAGGTGGCACCGAGCTCAACTTCAAGGAGTGGCAAAAGGCCTTTACCGATATGATGTAGAGACATATGTCCGTCTCACTTCCCAGCATTGACTGACTATAAGAAAGGACACATCTGTACTCTGCTCTGCAGCCTCC	BioCorp
KRT18	+	TCGGGTCGCGCGGCTCGCGCAGGCCGCCACCGTCGTCCGCAAAGCCTGAGTCCTGTCCTTCCTCTCCTCTCCAGACAGCATGACCGAGCTCAACTTCAAGGAGTGGCAAAAGGCCTTTACCGATATGATGGGAGGTGGCATGAGCTTCACCACTCGCTCCACCTTCTCCACCAACTACCGGTCCCTGGG	BioCorp
KRT5	+	CAGCACCTCCCAACCCACTAGTGCCTGGTTCTCTTGCTCCACCAGGAACAAGCCACCATGACCGAGCTCAACTTCAAGGAGTGGCAAAAGGCCTTTACCGATATGATGGGAGGTGGCATGTCTCGCCAGTCAAGTGTGTCCTTCCGGAGCGGGGGCAGTCGTAGCTTCAGCACCGCCTCTG	BioCorp
KRT14	+	TCCAATTTACCCGAGCACCTTCTCTTCACTCAGCCAACTGCTCGCTCGCTCACCTCCCTCTTCTCGCACCATGACCGAGCTCAACTTCAAGGAGTGGCAAAAGGCCTTTACCGATATGATGGGAGGTGGCATGACCACCTGCAGCCGCCAGTTCACCTCCTCCAGCTCCATGAAGGGCTCCTGCGGCATC	BioCorp
CDH1	-	AACGTGATTTCTGCATTTCCCAGCACATGGGTCTGGGGCCCGCCTCTCTCGAGTCCCCTACATCATATCGGTAAAGGCCTTTTGCCACTCCTTGAAGTTGAGCTCGGTGCCACCTCCGTCGTCCTCGCCGCCTCCGTACATGTCAGCCAGCTTCTTGAAGCGATTGCCCCATTCGTT	BioCorp
SOX2	-	CCATTTCCCTCGTTTTTCTTTGAAAATTTCTCCCCCCTCCAGTTCGCTGTCCGGCCCTCACATCATATCGGTAAAGGCCTTTTGCCACTCCTTGAAGTTGAGCTCGGTGCCACCTCCCATGTGTGAGAGGGGCAGTGTGCCGTTAATGGCCGTGCCGGGCACCGGGCCGCTCTGGTA	BioCorp
PAX6	+	GCTAACAGAGCCCCATATTCGAGCCCCGTGGAATCCCGCGGCCCCCAGCCAGAGCCAGCATGACCGAGCTCAACTTCAAGGAGTGGCAAAAGGCCTTTACCGATATGATGGGCGGTGGAATGCAGAACAGTAAGTGCCTCTGGTCTTTCTGGGACTTCGGGCTCGGGGTGCGCGGACCCG	BioCorp
NES	+	GGGCCAGGGTCAGTTCCTGAAGTTCACTCAGAGGGAAGGAGATAGAGAGTCCTGGTCCTCTGGAGAAGATGGAGGTGGCACCGAGCTCAACTTCAAGGAGTGGCAAAAGGCCTTTACCGATATGATGTAGGAAAAGACCATCTGCCCGGCACTGGGGACTTAGGGGTGCGGGGAGGGGAAGGACGCC	BioCorp
TUBB3	-	CACCTTGGCCCCGATCTGGTTGCCGCACTGGCCGGCCTGGATGTGCACGATCTCCCTCATGCCACCTCCCATCATATCGGTAAAGGCCTTTTGCCACTCCTTGAAGTTGAGCTCGGTCATACTGGGCGCGTCTGGCGGGCGGCTGCGGACGGGCGCGGGCGGGCCGGGCTGGCTGCTGAG	BioCorp
TBXT	+	TACGACGCCGCAGCCCAAGGCCGCCTCATAGCCTCATGGACACCTGTGTCGCCACCTTCCATGGGAGGTGGCACCGAGCTCAACTTCAAGGAGTGGCAAAAGGCCTTTACCGATATGATGTGAAGCAGCAAGGCCCAGGTCCCGAAAGATGCAGTGACTTTTTGTCGTGGCAGCCAG	BioCorp
NCAM1	-	CTGGTGAAGCTGCTGTGTCACTTTTTATTTTGATCTTTGCTCGGTTCTCTTCACCCATCACATCATATCGGTAAAGGCCTTTTGCCACTCCTTGAAGTTGAGCTCGGTGCCACCTCCTGCTTTGCTCTCGTTCTCCTTTGTCTGTGTGGCGTCATTGGGGACCGTCTTGACTTC	BioCorp
FOXA2	-	ACTTGCTCTCTCACTTGTCCTCGATCCGGGGTGCCAGAGTTAGCCGGGCCTGAAGCCGTCTTCGTCCTACATCATATCGGTAAAGGCCTTTTGCCACTCCTTGAAGTTGAGCTCGGTGCCACCTCCAGAGGAGTTCATAATGGGCCGGGAGTACACCCCCTGGTAGTAGGAGGTATCTGCGGCCAG	BioCorp
