# Supplementary material for: Endogenous tagging using split mNeonGreen in human iPSCs for live imaging studies
Source: eLife. 2024 Apr 23;12:RP92819. doi: 10.7554/eLife.92819 (PMC11037917; doi:10.7554/eLife.92819)
Supplement: Supplementary file 5. — The primers used to amplify and sequence each edited locus are listed. [file elife-92819-supp5.xlsx]

## Sheet: Sheet2
Locus	Orientation	Sequence
AAVS1	Forward	TCGACTTCCCCTCTTCCGATG
AAVS1	Reverse	CTCAGGTTCTGGGAGAGGGTAG
AAVS1-mNG21-10 left junction	Forward	TCGACTTCCCCTCTTCCGATG
AAVS1-mNG21-10 left junction	Reverse	GAGCCTAGGGCCGGGATTCTC
AAVS1-mNG21-10 right junction	Forward	TTCCATCAGTACCTGCCCTACC
AAVS1-mNG21-10 right junction	Reverse	TGGGGTCCAGGCCAAGTAG
AAVS1_OT1	Forward	GGATTTGGGTACATTAACCACTCCG
AAVS1_OT1	Reverse	TGGAGGGTGACTGGGAAAGTTAG
AAVS1_OT2	Forward	CTTGTCAAAGTGTGGGTTTGGTATC
AAVS1_OT2	Reverse	TCTGACAACCTCCTAGAACTGACTC
AAVS1_OT3	Forward	AAAGAGGGCCATGGGTCTAGC
AAVS1_OT3	Reverse	GAGTATCTCATTTGGAGTCAAGGGC
AAVS1_OT4	Forward	AATAGGGACAAGAGAGGTCACCC
AAVS1_OT4	Reverse	AGTGGTAGGCCAACTTCCCG
AAVS1_OT5	Forward	CAGTGGTTACTGGTCCACATCC
AAVS1_OT5	Reverse	GACCCATGTTGGAGGATAAGCAG
AAVS1_OT6	Forward	GGAAGGACGGTTCACCACTC
AAVS1_OT6	Reverse	CCCCGGACATCAGAGGCTA
AAVS1_OT7	Forward	GCCTGTTCAGCTAAGTCCAATTC
AAVS1_OT7	Reverse	GTGACTCCTGTGCTTCTAGCTC
AAVS1_OT8	Forward	AATTTCAGAGTGGTGCTCCACAAG
AAVS1_OT8	Reverse	CACCTTCCCATCCTCTAATGAGAATC
AAVS1_OT9	Forward	TGAGGAGGAGGAGAGAATCCG
AAVS1_OT9	Reverse	GGACTAAGTGGGGCATCTTCC
AAVS1_OT10	Forward	TTGCAGTTATTGGTTGTCTTGCC
AAVS1_OT10	Reverse	CAGGTGGTGTGGCTAATTCCAG
AAVS1_OT11	Forward	CTTTGCCAGTCACCACACTCG
AAVS1_OT11	Reverse	CCACCTTTTTCACGGGGGAAG
AAVS1_OT12	Forward	GGCTTCACCTCCTATTTCTAGTCC
AAVS1_OT12	Reverse	ACACACACAGGCCTCAATCG
H2BC11	Forward	CAAGCAGAAGACGGCATACGAGATNNNYRNNNYRNNNYRNNNCTATGCCAGAGCCAGCGAAG
H2BC11	Reverse	AATGATACGGCGACCACCGAGATCNNNYRNNNYRNNNYRNNNAGGAGGAATACAAGCACCAGC
ACTB	Forward	CAAGCAGAAGACGGCATACGAGATNNNYRNNNYRNNNYRNNNCTGTTTGAACCGGGCGGAG
ACTB	Reverse	AATGATACGGCGACCACCGAGATCNNNYRNNNYRNNNYRNNNCGTGCTCGATGGGGTACTTC
TUBA1B	Forward	CAAGCAGAAGACGGCATACGAGATNNNYRNNNYRNNNYRNNNTTGCATGAGTATTTTGTTCCACTTGAC
TUBA1B	Reverse	AATGATACGGCGACCACCGAGATCNNNYRNNNYRNNNYRNNNTTCCTTGCCTGTGATGAGCTG
ANLN	Forward	CAAGCAGAAGACGGCATACGAGATNNNYRNNNYRNNNYRNNNGCTGGTTGTGGGAGAGTTCC
ANLN	Reverse	AATGATACGGCGACCACCGAGATCNNNYRNNNYRNNNYRNNNCATTAGCATCTCCCCTGCGG
RHOA	Forward	CAAGCAGAAGACGGCATACGAGATNNNYRNNNYRNNNYRNNNAGGTGGATCGGCGTACTAGAAG
RHOA	Reverse	AATGATACGGCGACCACCGAGATCNNNYRNNNYRNNNYRNNNCTTGGACTAAGATGGCAGGATGAG
RACGAP1	Forward	CAAGCAGAAGACGGCATACGAGATNNNYRNNNYRNNNYRNNNACACTCCTAGGTATGCAGAATTGG
RACGAP1	Reverse	AATGATACGGCGACCACCGAGATCNNNYRNNNYRNNNYRNNNTCCATACTAACCCTTCTACCCCTG
KRT18	Forward	CAAGCAGAAGACGGCATACGAGATNNNYRNNNYRNNNYRNNNTGCGATATAACTCGGGTCGC
KRT18	Reverse	AATGATACGGCGACCACCGAGATCNNNYRNNNYRNNNYRNNNGGTCCCTCCTACCCCTTACC
KRT5	Forward	CAAGCAGAAGACGGCATACGAGATNNNYRNNNYRNNNYRNNNAAAGGGGGCATCACCGTTC
KRT5	Reverse	AATGATACGGCGACCACCGAGATCNNNYRNNNYRNNNYRNNNAACCAAATCCACTACCGGCAC
KRT14	Forward	CAAGCAGAAGACGGCATACGAGATNNNYRNNNYRNNNYRNNNCAGCAGCAGGCTTCCTCTAC
KRT14	Reverse	AATGATACGGCGACCACCGAGATCNNNYRNNNYRNNNYRNNNAGGAGAAGCGGGAGGATGAG
CDH1	Forward	CAAGCAGAAGACGGCATACGAGATNNNYRNNNYRNNNYRNNNCGTTGTTGGTGTTCACTGCTC
CDH1	Reverse	AATGATACGGCGACCACCGAGATCNNNYRNNNYRNNNYRNNNCCAGAAACTCATCTCAAGGGAAGG
SOX2	Forward	CAAGCAGAAGACGGCATACGAGATNNNYRNNNYRNNNYRNNNGTTCGGTGGTCAAGTCCGAG
SOX2	Reverse	AATGATACGGCGACCACCGAGATCNNNYRNNNYRNNNYRNNNTACCAACGGTGTCAACCTGC
PAX6	Forward	CAAGCAGAAGACGGCATACGAGATNNNYRNNNYRNNNYRNNNTGTTTCAAGCCCCAAAGGGTAG
PAX6	Reverse	AATGATACGGCGACCACCGAGATCNNNYRNNNYRNNNYRNNNAAGAGCCAAGCAAACGCCC
NES	Forward	CAAGCAGAAGACGGCATACGAGATNNNYRNNNYRNNNYRNNNGAGTGATGAACGGGCTGGAG
NES	Reverse	AATGATACGGCGACCACCGAGATCNNNYRNNNYRNNNYRNNNGGAGCAGGCAAGAGATTCCC
TUBB3	Forward	CAAGCAGAAGACGGCATACGAGATNNNYRNNNYRNNNYRNNNCATCAGCCGATGCGAAGGG
TUBB3	Reverse	AATGATACGGCGACCACCGAGATCNNNYRNNNYRNNNYRNNNGTCTCACTCAAGGCTATGCCG
TBXT	Forward	CAAGCAGAAGACGGCATACGAGATNNNYRNNNYRNNNYRNNNTGGTCTGTGAGCAACGGC
TBXT	Reverse	AATGATACGGCGACCACCGAGATCNNNYRNNNYRNNNYRNNNTTCATCTGTAAGCCACCTGGG
NCAM1	Forward	CAAGCAGAAGACGGCATACGAGATNNNYRNNNYRNNNYRNNNCCTCTGGCATCAACTTAGGGC
NCAM1	Reverse	AATGATACGGCGACCACCGAGATCNNNYRNNNYRNNNYRNNNCAAGTGAGTGTGCAACAAAGGG
FOXA2	Forward	CAAGCAGAAGACGGCATACGAGATNNNYRNNNYRNNNYRNNNCTCAAGGCCTACGAACAGGTG
FOXA2	Reverse	AATGATACGGCGACCACCGAGATCNNNYRNNNYRNNNYRNNNGCAACAACAGCAATGGAGGAG
