# Supplementary material for: Endogenous tagging using split mNeonGreen in human iPSCs for live imaging studies
Source: eLife. 2024 Apr 23;12:RP92819. doi: 10.7554/eLife.92819 (PMC11037917; doi:10.7554/eLife.92819)
Supplement: Supplementary file 6. — The primers used to add unique barcodes onto locus-specific amplicons for pooled Nanopore sequencing are shown. [file elife-92819-supp6.xlsx]

## Sheet: Sheet2
Primer name	Orientation	Barcode sequence	Primer sequence
H2BC11_Fwd	Forward	TCTGCTCCCGCCCCGAAAAAGGGC	Gene-specific primers are listed in Table S5
H2BC11_Rev	Reverse	TCTTTCTTTGAGAACATGGGTGGC	Gene-specific primers are listed in Table S5
ACTB_Fwd	Forward	GCGGGGCTGGCGCCCGGTTGGGAG	Gene-specific primers are listed in Table S5
ACTB_Rev	Reverse	AGGGTGAGGATGCCTCTCTTGCTC	Gene-specific primers are listed in Table S5
TUBA1B_Fwd	Forward	AGTCATCAATAGATTGGTTTAAAT	Gene-specific primers are listed in Table S5
TUBA1B_Rev	Reverse	CTCAGGGTGGAAGAGCTGGCGGTA	Gene-specific primers are listed in Table S5
ANLN_Fwd	Forward	CCCGCCTCAGACTCCTGGTTTTTT	Gene-specific primers are listed in Table S5
ANLN_Rev	Reverse	GCTGCGTGAACTCCGCAAATCACA	Gene-specific primers are listed in Table S5
RHOA_Fwd	Forward	TTTGAATTTGAGTATGCTAATAGA	Gene-specific primers are listed in Table S5
RHOA_Rev	Reverse	AATGGATTCTTCTTTCCAACATTT	Gene-specific primers are listed in Table S5
RACGAP1_Fwd	Forward	CCTTCCTAGGAAATAAAAAACAAC	Gene-specific primers are listed in Table S5
RACGAP1_Rev	Reverse	GAAAGATGTCTCATCTAAAAGCTC	Gene-specific primers are listed in Table S5
KRT18_Fwd	Forward	GCGGCTCGCGCAGGCCGCCACCGT	Gene-specific primers are listed in Table S5
KRT18_Rev	Reverse	TGAGCCCTCAGGTCCTCGATGATC	Gene-specific primers are listed in Table S5
KRT5_Fwd	Forward	CTGGGTAACAGAGCCACCTTCTGC	Gene-specific primers are listed in Table S5
KRT5_Rev	Reverse	CACCTCCAAAGCCATAGCCGCCTC	Gene-specific primers are listed in Table S5
KRT14_Fwd	Forward	GTGGATGTTAAAGGCCCATTCAGT	Gene-specific primers are listed in Table S5
KRT14_Rev	Reverse	ACAGACAGGCCGCCCCCGTAGGTG	Gene-specific primers are listed in Table S5
CDH1_Fwd	Forward	CGTGGTGTGCCACAAGTCTGGGTG	Gene-specific primers are listed in Table S5
CDH1_Rev	Reverse	GAGCTGAAAAACCACCAGCAACGT	Gene-specific primers are listed in Table S5
SOX2_Fwd	Forward	GCCAGCTCCAGCCCCCCTGTGGTT	Gene-specific primers are listed in Table S5
SOX2_Rev	Reverse	ATGGCCATTTTTGCTTTTAACAGT	Gene-specific primers are listed in Table S5
PAX6_Fwd	Forward	ATTTTGTATGCACTGCAGGGCAGA	Gene-specific primers are listed in Table S5
PAX6_Rev	Reverse	TCCCCTCCCGGGCTGCCGGGCGCG	Gene-specific primers are listed in Table S5
NES_Fwd	Forward	CAGTCTGAGGAAGTGGGGCAAGGA	Gene-specific primers are listed in Table S5
NES_Rev	Reverse	TTTGCAGGGTGGGAGGTTATATTC	Gene-specific primers are listed in Table S5
TUBB3_Fwd	Forward	CGGGGCCGCGGCTATAAGAGCGCG	Gene-specific primers are listed in Table S5
TUBB3_Rev	Reverse	CGGCCCCAAAAAAGAGGGCCACGC	Gene-specific primers are listed in Table S5
TBXT_Fwd	Forward	GCCGTCACCCCGGGCTCCCAGGCA	Gene-specific primers are listed in Table S5
TBXT_Rev	Reverse	ACAGCACCGCTACTGCAGGTGTGA	Gene-specific primers are listed in Table S5
NCAM1_Fwd	Forward	TGGAAGAGGAAAGGACTCGTTCTT	Gene-specific primers are listed in Table S5
NCAM1_Rev	Reverse	ACCCTTTCTATAAACCTACAAAAA	Gene-specific primers are listed in Table S5
FOXA2_Fwd	Forward	ATGCACTACCCCGGCTACGGTTCC	Gene-specific primers are listed in Table S5
FOXA2_Rev	Reverse	AACAACAACAACAAAAAAATCAGA	Gene-specific primers are listed in Table S5
BC1_Fwd	Forward	CACAAAGACACCGACAACTTTCTT	CACAAAGACACCGACAACTTTCTTCAAGCAGAAGACGGCATACGAGAT
BC2_Fwd	Forward	ACAGACGACTACAAACGGAATCGA	ACAGACGACTACAAACGGAATCGACAAGCAGAAGACGGCATACGAGAT
BC3_Fwd	Forward	CCTGGTAACTGGGACACAAGACTC	CCTGGTAACTGGGACACAAGACTCCAAGCAGAAGACGGCATACGAGAT
BC4_Fwd	Forward	TAGGGAAACACGATAGAATCCGAA	TAGGGAAACACGATAGAATCCGAACAAGCAGAAGACGGCATACGAGAT
BC5_Fwd	Forward	AAGGTTACACAAACCCTGGACAAG	AAGGTTACACAAACCCTGGACAAGCAAGCAGAAGACGGCATACGAGAT
BC6_Fwd	Forward	GACTACTTTCTGCCTTTGCGAGAA	GACTACTTTCTGCCTTTGCGAGAACAAGCAGAAGACGGCATACGAGAT
BC7_Fwd	Forward	AAGGATTCATTCCCACGGTAACAC	AAGGATTCATTCCCACGGTAACACCAAGCAGAAGACGGCATACGAGAT
BC8_Fwd	Forward	ACGTAACTTGGTTTGTTCCCTGAA	ACGTAACTTGGTTTGTTCCCTGAACAAGCAGAAGACGGCATACGAGAT
BC9_Rev	Reverse	AACCAAGACTCGCTGTGCCTAGTT	AACCAAGACTCGCTGTGCCTAGTTAATGATACGGCGACCACCGAGATC
BC10_Rev	Reverse	GAGAGGACAAAGGTTTCAACGCTT	GAGAGGACAAAGGTTTCAACGCTTAATGATACGGCGACCACCGAGATC
BC11_Rev	Reverse	TCCATTCCCTCCGATAGATGAAAC	TCCATTCCCTCCGATAGATGAAACAATGATACGGCGACCACCGAGATC
BC12_Rev	Reverse	TCCGATTCTGCTTCTTTCTACCTG	TCCGATTCTGCTTCTTTCTACCTGAATGATACGGCGACCACCGAGATC
BC13_Rev	Reverse	AGAACGACTTCCATACTCGTGTGA	AGAACGACTTCCATACTCGTGTGAAATGATACGGCGACCACCGAGATC
BC14_Rev	Reverse	AACGAGTCTCTTGGGACCCATAGA	AACGAGTCTCTTGGGACCCATAGAAATGATACGGCGACCACCGAGATC
BC15_Rev	Reverse	AGGTCTACCTCGCTAACACCACTG	AGGTCTACCTCGCTAACACCACTGAATGATACGGCGACCACCGAGATC
BC16_Rev	Reverse	CGTCAACTGACAGTGGTTCGTACT	CGTCAACTGACAGTGGTTCGTACTAATGATACGGCGACCACCGAGATC
BC17_Rev	Reverse	ACCCTCCAGGAAAGTACCTCTGAT	ACCCTCCAGGAAAGTACCTCTGATAATGATACGGCGACCACCGAGATC
BC18_Rev	Reverse	CCAAACCCAACAACCTAGATAGGC	CCAAACCCAACAACCTAGATAGGCAATGATACGGCGACCACCGAGATC
BC19_Rev	Reverse	GTTCCTCGTGCAGTGTCAAGAGAT	GTTCCTCGTGCAGTGTCAAGAGATAATGATACGGCGACCACCGAGATC
BC20_Rev	Reverse	TTGCGTCCTGTTACGAGAACTCAT	TTGCGTCCTGTTACGAGAACTCATAATGATACGGCGACCACCGAGATC
