# Supplementary material for: Endogenous tagging using split mNeonGreen in human iPSCs for live imaging studies
Source: eLife. 2024 Apr 23;12:RP92819. doi: 10.7554/eLife.92819 (PMC11037917; doi:10.7554/eLife.92819)
Supplement: Supplementary file 7. — For each cell lines imaged, the laser power and exposure time used to acquire low- and high-exposure images are listed. These parameters were used to acquire the neural network training dataset, and the low-exposure settings were used to acquire timelapse images for restoration. [file elife-92819-supp7.xlsx]

## Sheet: Sheet2
Cell line	Imaging condition	405 nm laser, 50 mW		488 nm laser, 50 mW
		Laser power (%)	Exposure time (ms)	Laser power (%)	Exposure time (ms)
H2BC11-smNG2	Low exposure	3	200	8	200
	High exposure	30	800	90	800
smNG2-ACTB	Low exposure	6	200	12	200
	High exposure	50	200	25	200
smNG2-TUBA1B	Low exposure	3	200	6	200
	High exposure	50	200	60	200
smNG2-ANLN	Low exposure	4	200	16	200
	High exposure	30	800	90	800
smNG2-RHOA	Low exposure	4	200	20	200
	High exposure	30	800	90	800
